# Supplementary material for: The factors that govern the allosteric chemical sensing of polythiophene chemosensors: scope and limitation toward signal-amplification sensing
Source: Royal Society of Chemistry journal article supplement (doi:10.1039/d1ra05795b), 2021-01-01
Supplement: d1ra05795b1.pdf [file d1ra05795b1.pdf]

*Electronic Supplementary Information*

**The factors that govern the allosteric chemical sensing of polythiophene chemosensors: scope and limitation toward signal-amplification sensing**

*Tomoaki Tsuchiya,<sup>a</sup> Hiroaki Mizuno<sup>a</sup> and Gaku Fukuhara<sup>\*ab</sup>*

<sup>a</sup>Department of Chemistry, Tokyo Institute of Technology, 2-12-1 Ookayama, Meguro-ku, Tokyo 152-8551,  
Japan

<sup>b</sup>JST, PRESTO, 4-1-8 Honcho, Kawaguchi, Saitama 332-0012, Japan

\*E-mail: [gaku@chem.titech.ac.jp](mailto:gaku@chem.titech.ac.jp)

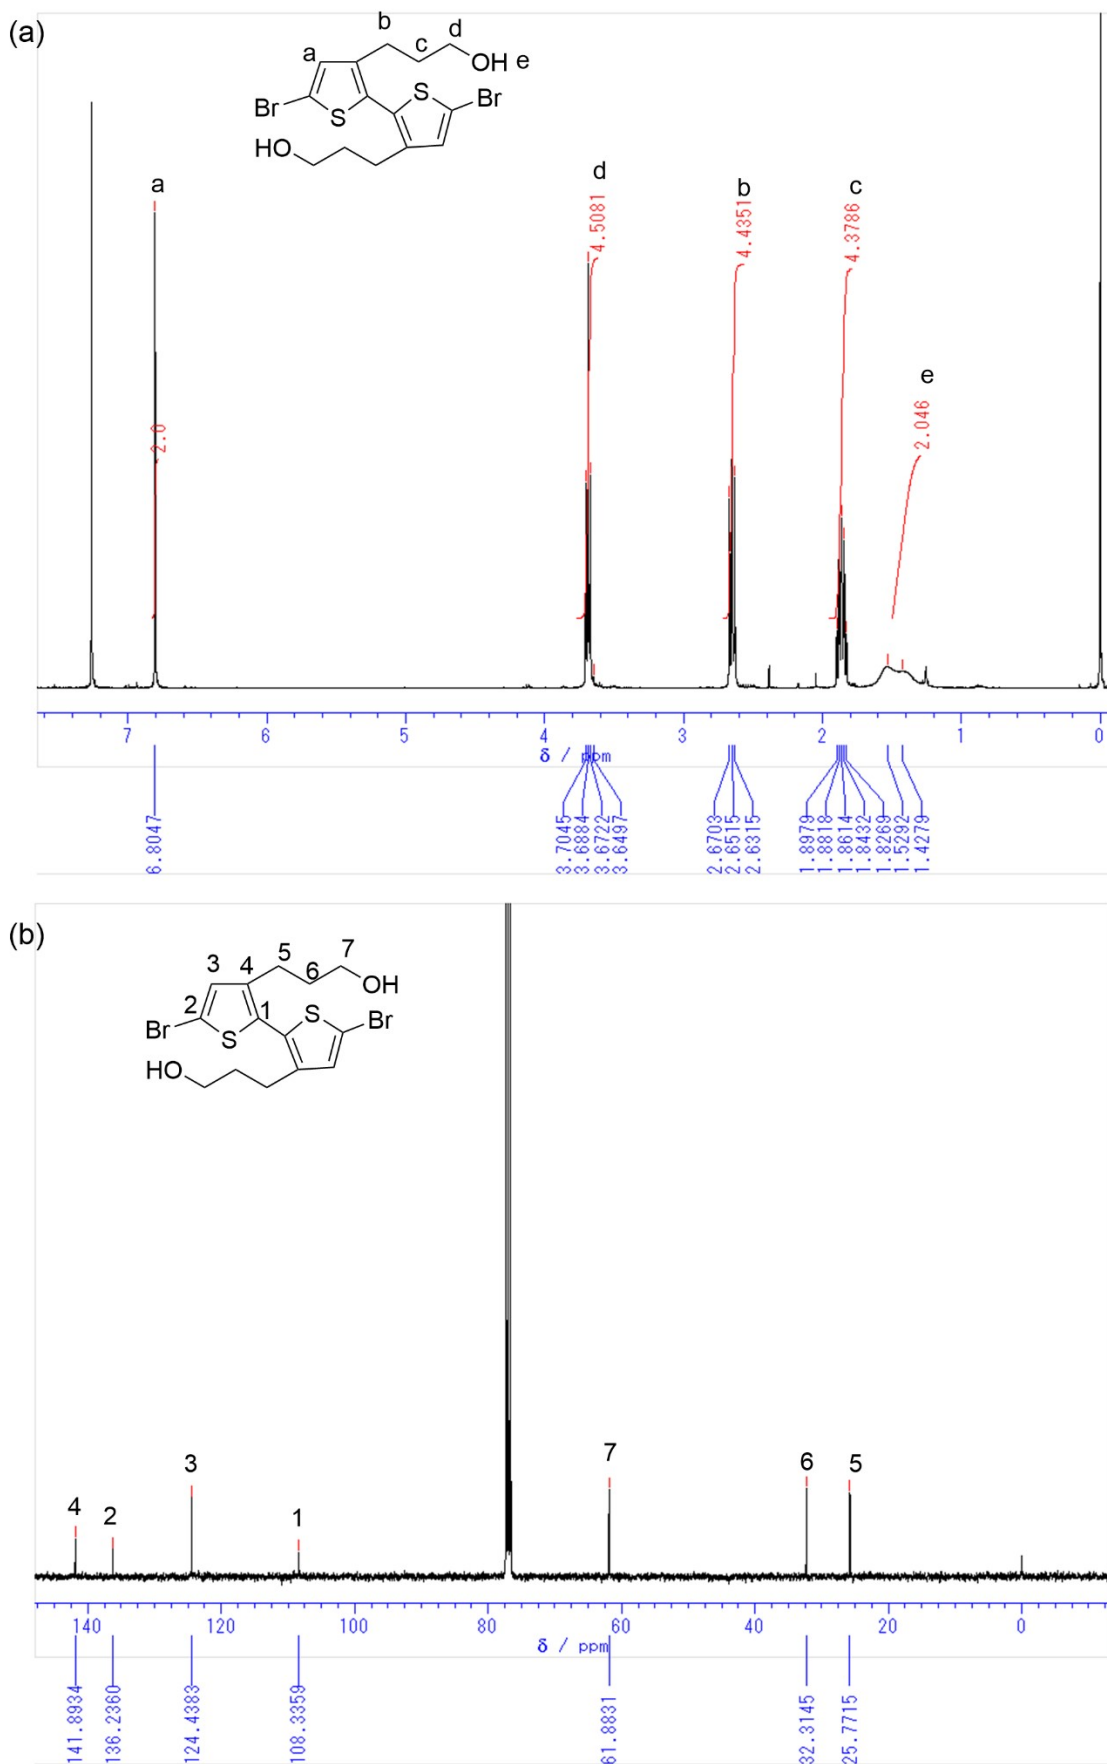

**Figure S1.** (a)  $^1\text{H}$  (400 MHz) and (b)  $^{13}\text{C}$  NMR spectra (100 MHz) of 3,3'-(5,5'-dibromo-[2,2'-bithiophene]-3,3'-diyl)bis(propan-1-ol) in  $\text{CDCl}_3$ .

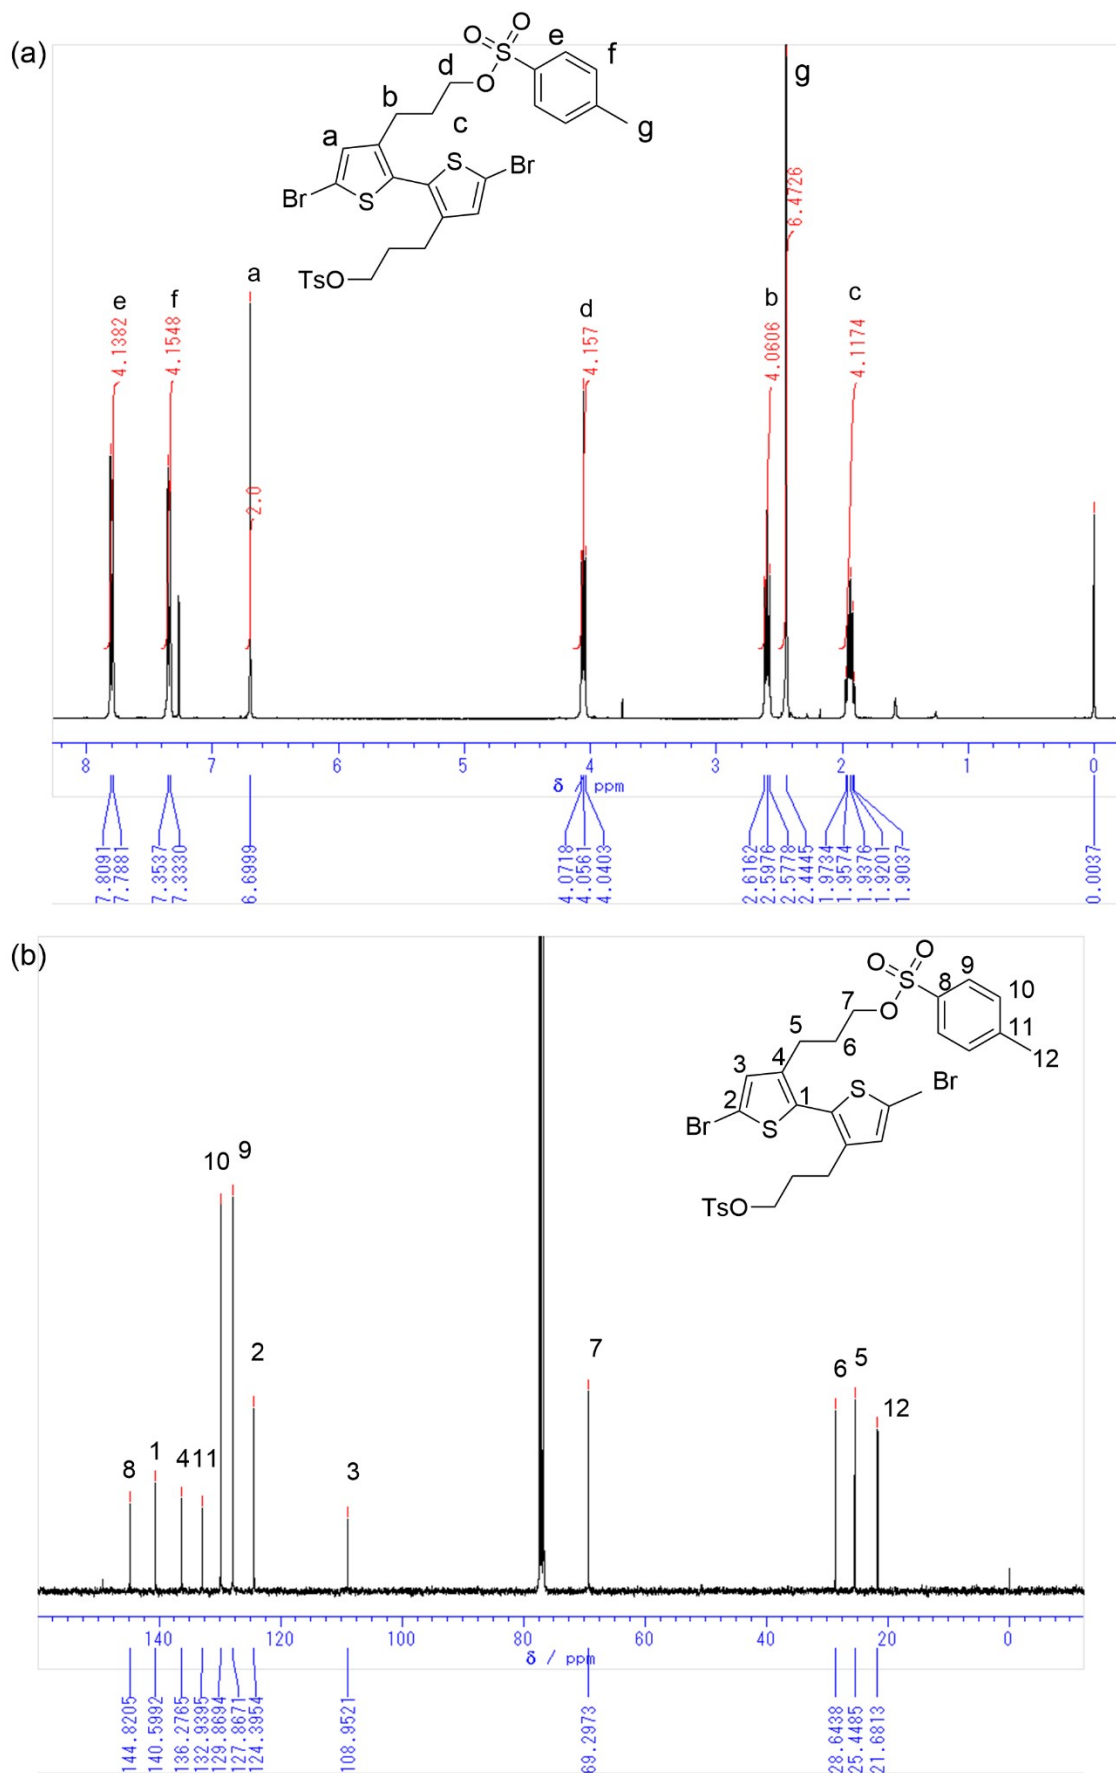

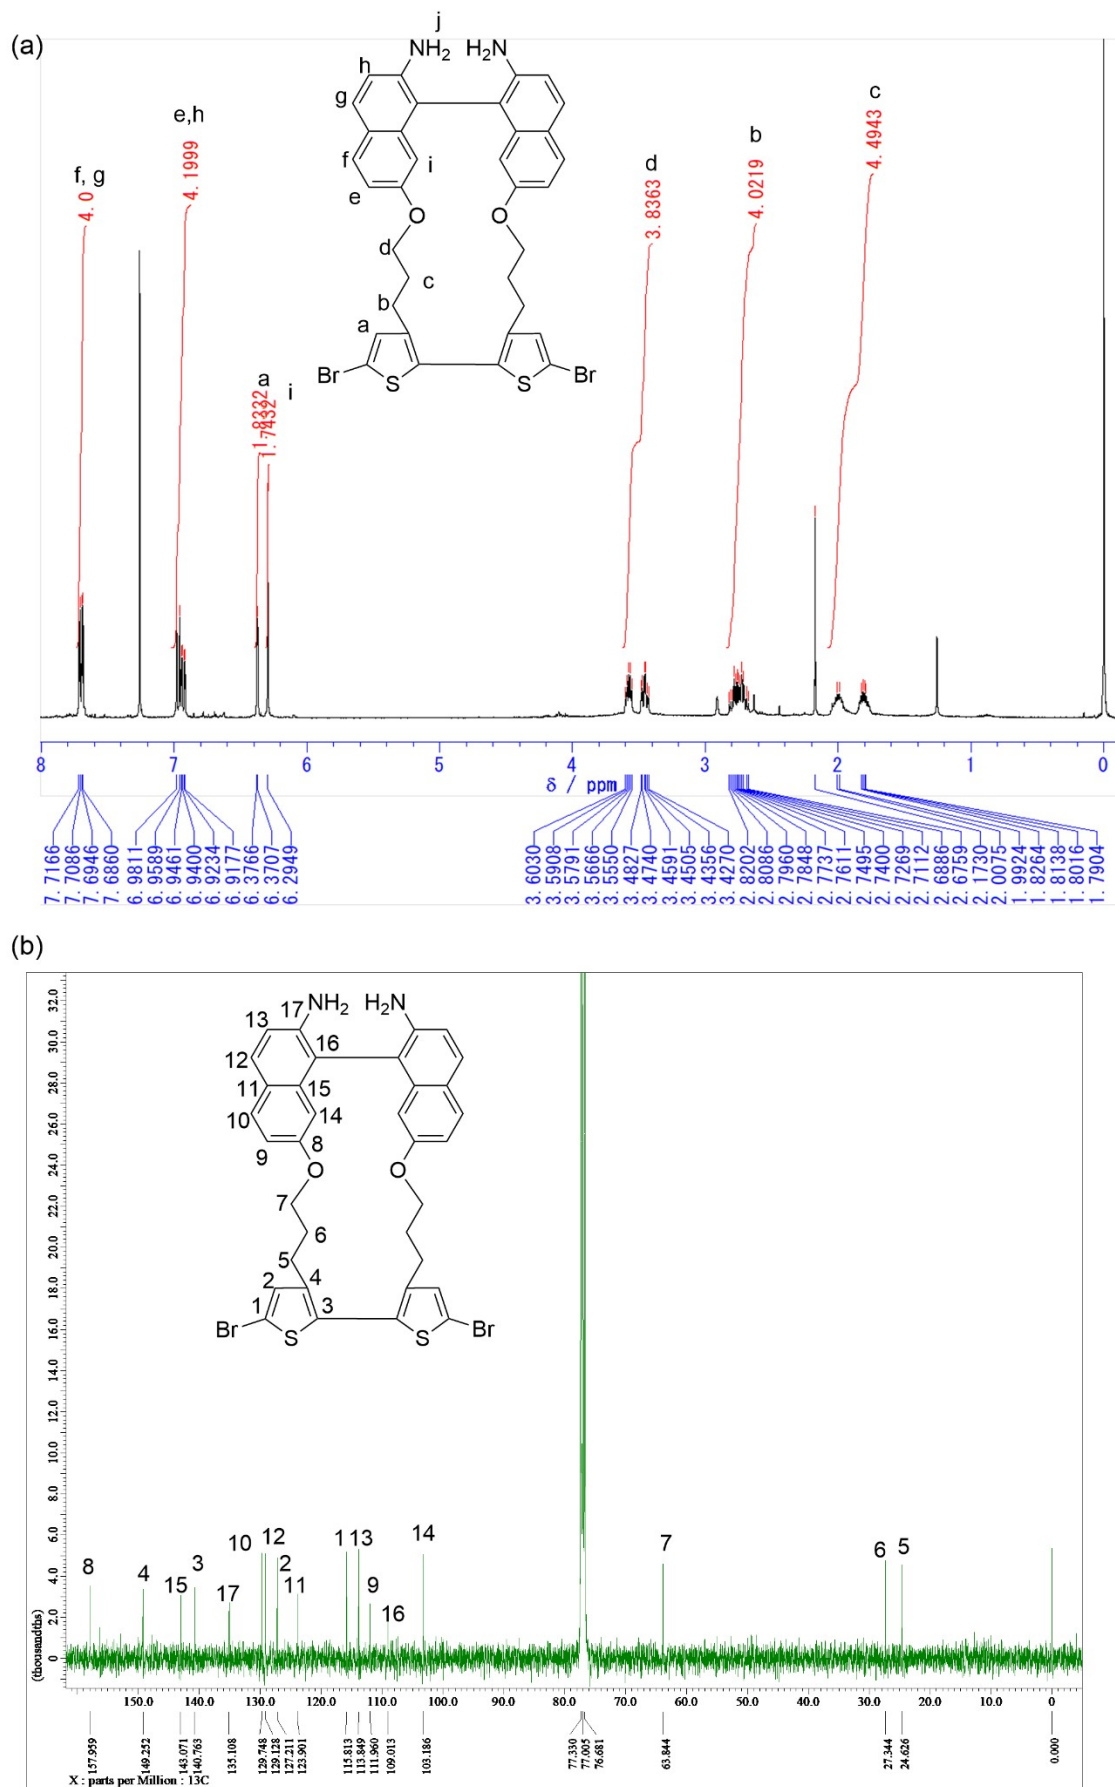

**Figure S3.** (a)  $^1\text{H}$  (400 MHz) and (b)  $^{13}\text{C}$  NMR spectra (100 MHz) of binaphthyl-dibromobithiophene conjugate in  $\text{CDCl}_3$ .

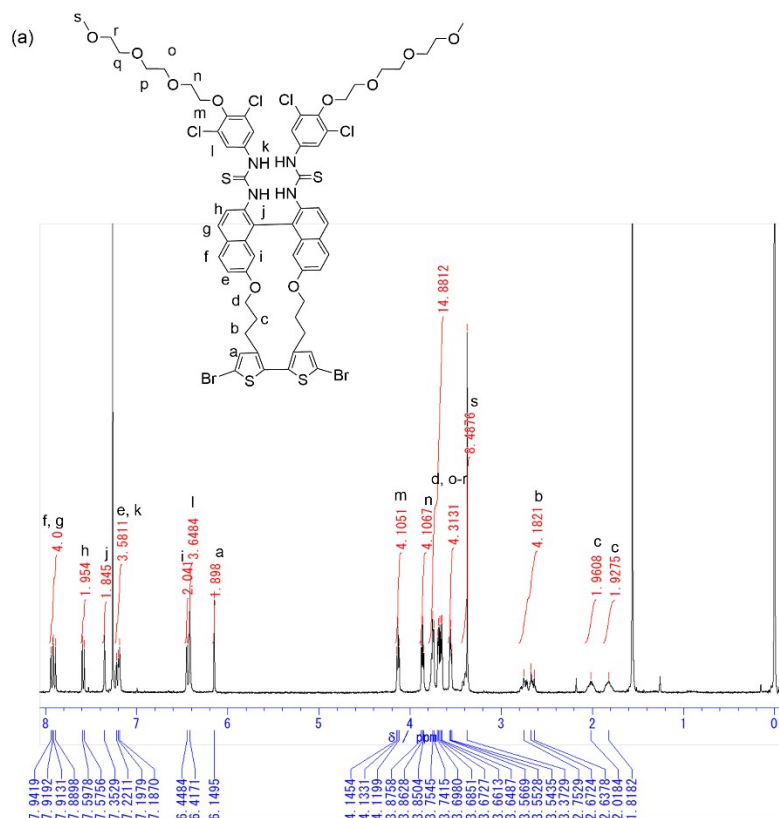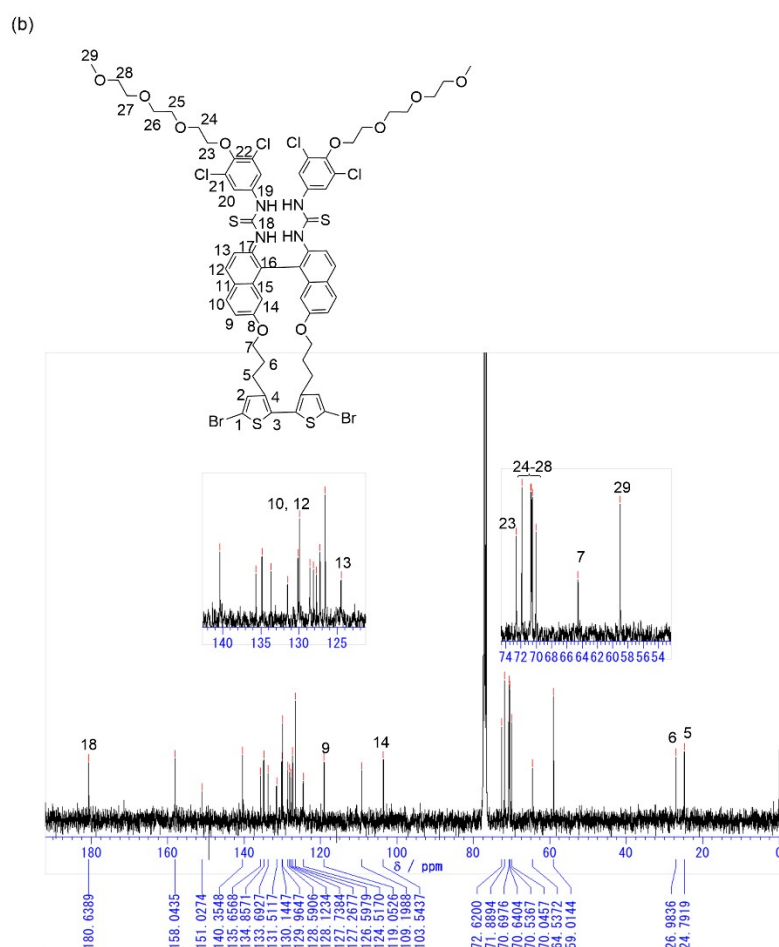

**Figure S4.** (a) <sup>1</sup>H (400 MHz) and (b) <sup>13</sup>C NMR spectra (100 MHz) of bis-thiourea-binaphthyl-dibromobithiophene conjugate (dibrominated TM) in CDCl<sub>3</sub>.

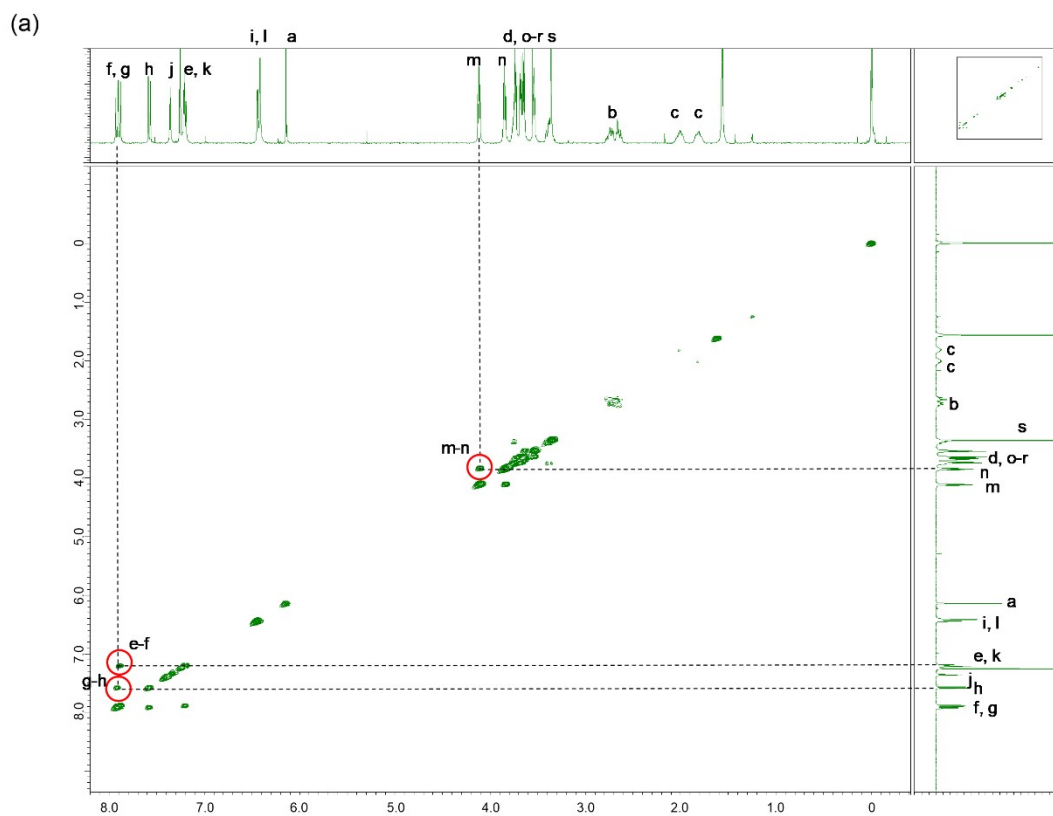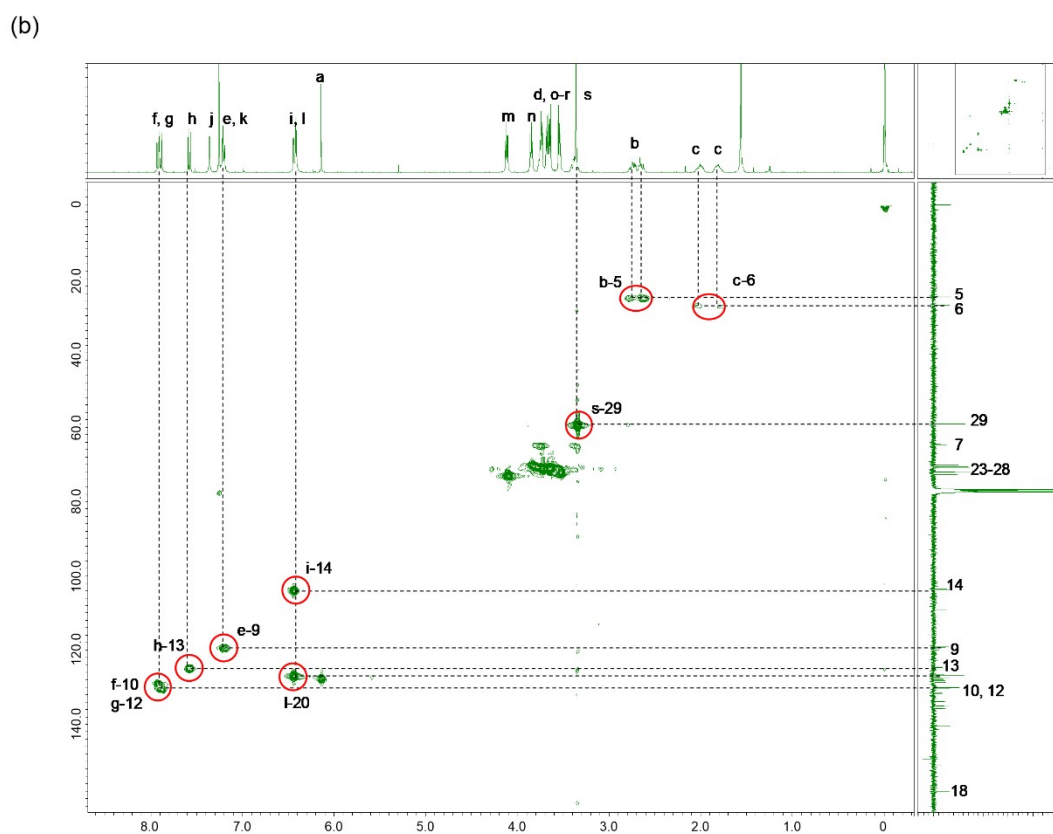

**Figure S5.** (a) COSY and (b) HMQC spectra of bis-thiourea-binaphthyl-dibromobithiophene conjugate (dibrominated **TM**) in  $\text{CDCl}_3$ .

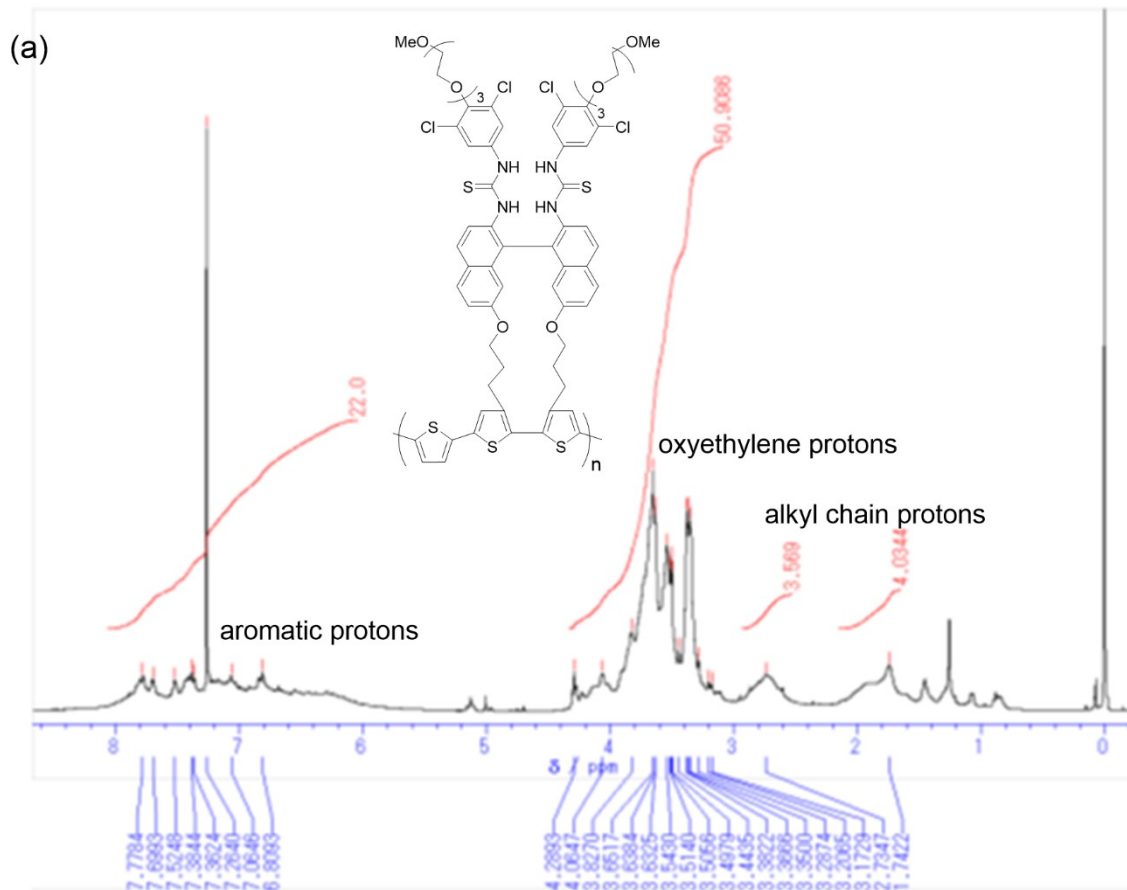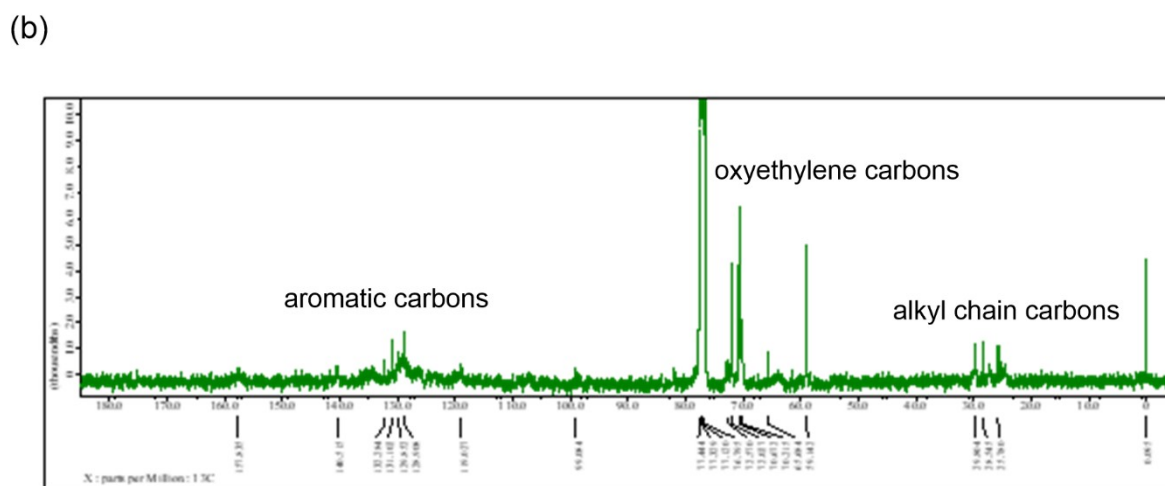

**Figure S6.** (a)  $^1\text{H}$  (400 MHz) and (b)  $^{13}\text{C}$  NMR spectra (100 MHz) of **PT1** in  $\text{CDCl}_3$ .

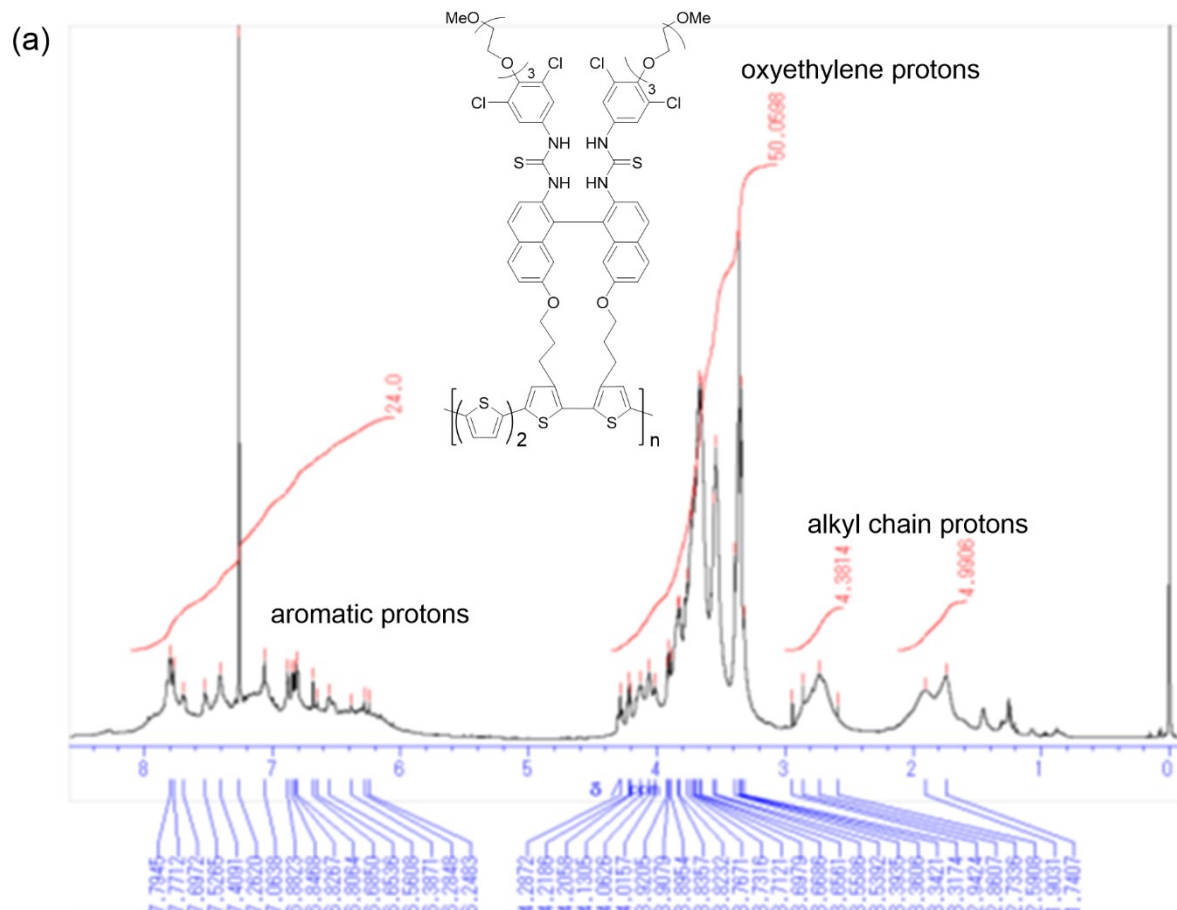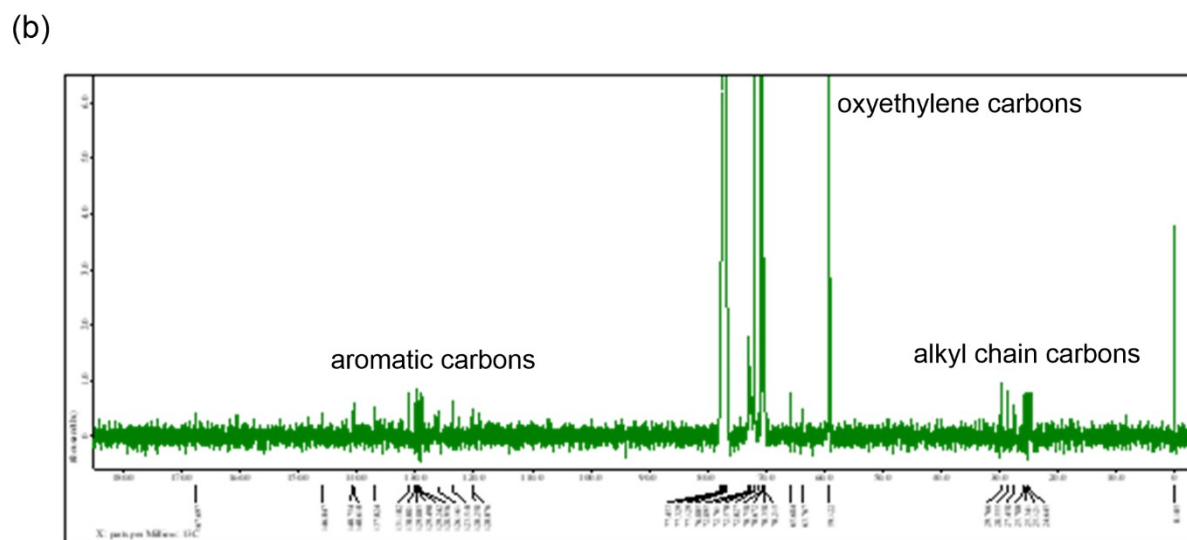

Figure S7. (a)  $^1\text{H}$  (400 MHz) and (b)  $^{13}\text{C}$  NMR spectra (100 MHz) of PT2 in  $\text{CDCl}_3$ .



(a)

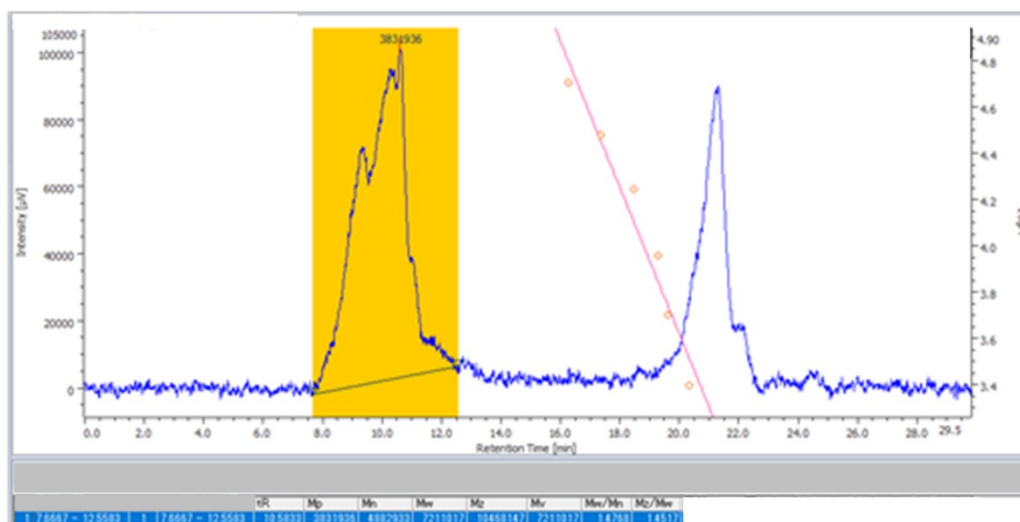

(b)

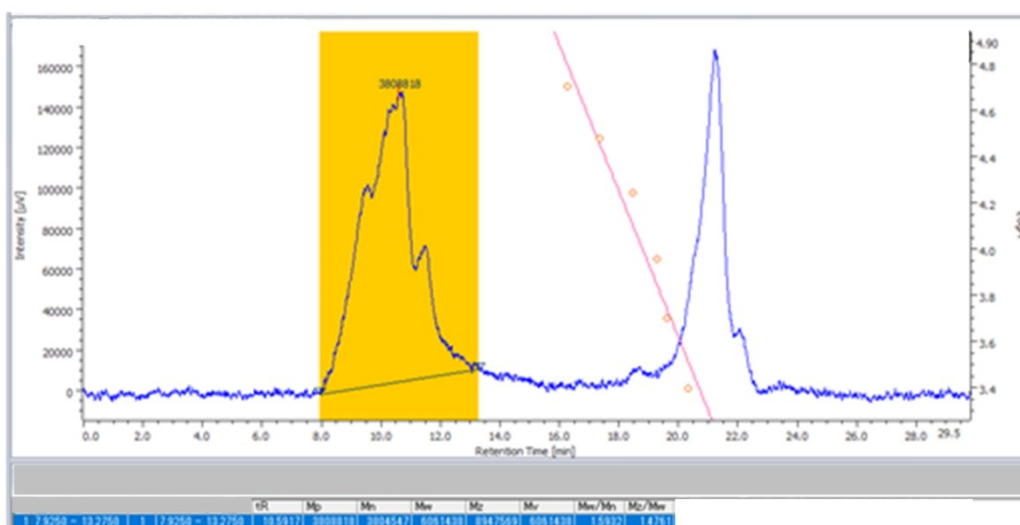

Figure S8. Analytical GPC chromatograms of (a) PT1 and (b) PT2.

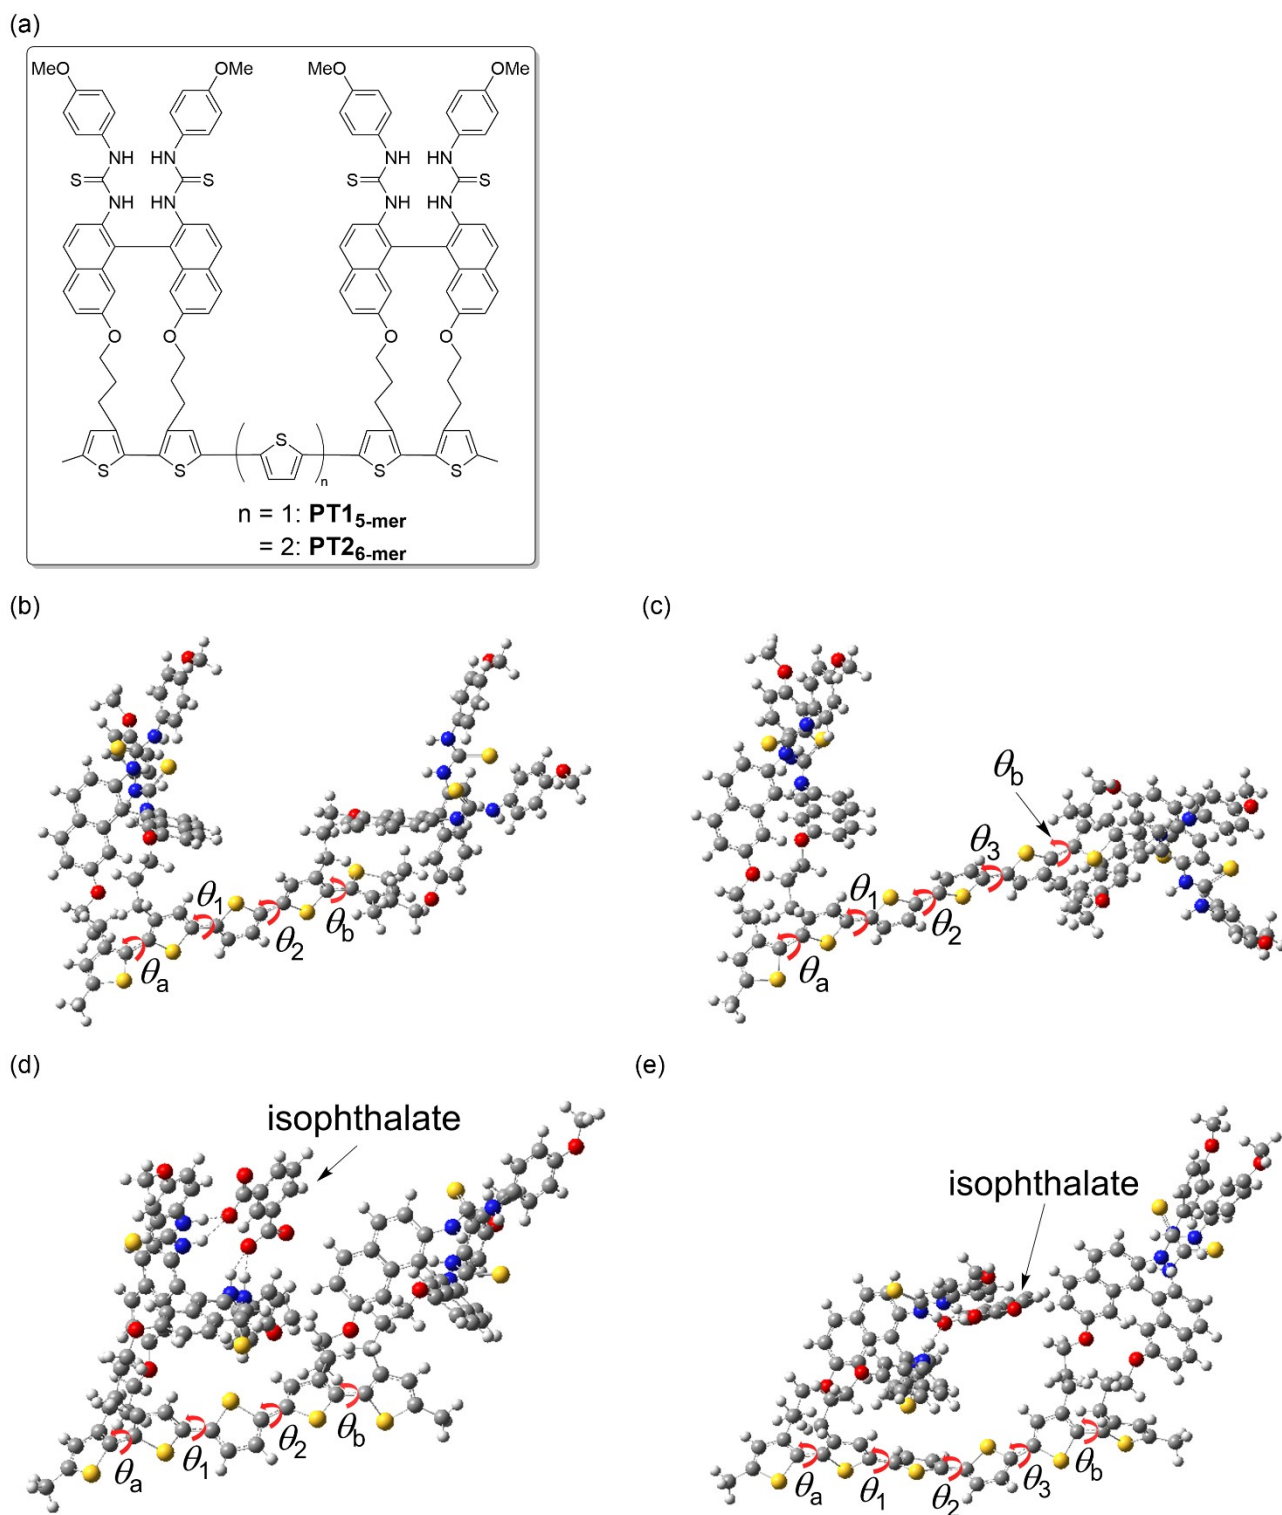

**Figure S9.** (a) Chemical structures of model compounds for **PT1** as **PT1**<sub>5-mer</sub> and for **PT2** as **PT2**<sub>6-mer</sub>, where the oxyethylenes and the chloride groups were omitted and both ends at  $\alpha$  position of thiophenes were methylated for the simplification reason. The optimized structures of **PT1**<sub>5-mer</sub> and **PT2**<sub>6-mer</sub> via Gaussian 16 calculation (HF/6-31G) in the absence (b,c) and presence of isophthalate (d,e); counter cation was omitted for clarification.

## Summary of Structure Optimization

### PT1<sub>5-mer</sub>

| Symbol | X        | Y        | Z        |
|--------|----------|----------|----------|
| C      | 0.911679 | -4.12421 | 1.787766 |
| C      | 0.064366 | -3.32224 | 1.112746 |
| C      | -1.14875 | -2.97063 | 1.812063 |
| C      | -1.23149 | -3.51815 | 3.043415 |
| S      | 0.236923 | -4.51909 | 3.409957 |
| C      | -2.26856 | -3.38353 | 4.060864 |
| C      | -3.44948 | -4.02489 | 4.186488 |
| C      | -4.18607 | -3.62548 | 5.37022  |
| C      | -3.58976 | -2.70235 | 6.139732 |
| S      | -2.0055  | -2.22938 | 5.439692 |
| C      | -4.74574 | -0.7506  | -1.37659 |
| C      | -5.71659 | -1.14198 | -2.25008 |
| C      | -7.07961 | -1.16985 | -1.87884 |
| C      | -7.44059 | -0.78081 | -0.56939 |
| C      | -6.41812 | -0.36619 | 0.319428 |
| C      | -5.10822 | -0.35521 | -0.07005 |
| C      | -8.08839 | -1.60054 | -2.77667 |
| C      | -9.3921  | -1.61718 | -2.4087  |
| C      | -9.77036 | -1.18971 | -1.10894 |
| C      | -8.82659 | -0.81126 | -0.18528 |
| C      | -8.26318 | -3.66905 | 2.96491  |
| C      | -8.45301 | -2.75937 | 1.97037  |
| C      | -8.98329 | -1.47263 | 2.256962 |
| C      | -9.29954 | -1.15858 | 3.597129 |
| C      | -9.10804 | -2.1393  | 4.602753 |
| C      | -8.60859 | -3.36884 | 4.301258 |
| C      | -9.20337 | -0.48955 | 1.231731 |
| C      | -9.72218 | 0.733441 | 1.57865  |
| C      | -9.98936 | 1.057609 | 2.932694 |
| C      | -9.7922  | 0.133927 | 3.905387 |
| C      | -2.17923 | -2.06249 | 1.188375 |
| O      | -4.197   | 0.021569 | 0.888875 |
| O      | -7.76118 | -4.91738 | 2.642465 |
| N      | -11.1322 | -1.24096 | -0.71591 |

|   |          |          |          |
|---|----------|----------|----------|
| N | -9.91387 | 1.711752 | 0.568558 |
| C | -12.233  | -0.84425 | -1.39959 |
| C | -10.9954 | 2.499915 | 0.357258 |
| N | -13.3807 | -1.05515 | -0.73669 |
| S | -12.1967 | -0.10393 | -2.9796  |
| N | -10.8602 | 3.331955 | -0.68652 |
| S | -12.4462 | 2.441075 | 1.324124 |
| C | -14.697  | -0.71778 | -1.19033 |
| C | -11.8467 | 4.249108 | -1.17512 |
| C | -15.428  | -1.63182 | -1.9231  |
| C | -16.723  | -1.33503 | -2.32986 |
| C | -17.2773 | -0.11026 | -1.99145 |
| C | -16.5441 | 0.811225 | -1.25158 |
| C | -15.2573 | 0.509951 | -0.85379 |
| C | -11.8527 | 5.563566 | -0.72303 |
| C | -12.7688 | 6.465126 | -1.22415 |
| C | -13.6897 | 6.053525 | -2.18205 |
| C | -13.689  | 4.743629 | -2.63535 |
| C | -12.7617 | 3.842057 | -2.12687 |
| C | -2.81348 | 0.348087 | 0.654818 |
| C | -6.51022 | -5.35495 | 3.219032 |
| C | -1.92325 | -0.57259 | 1.476308 |
| C | -5.31451 | -4.68819 | 2.547512 |
| C | -3.96581 | -5.06041 | 3.2158   |
| H | 0.266547 | -2.9727  | 0.119786 |
| H | -5.14103 | -4.03765 | 5.624042 |
| H | -3.72328 | -0.75818 | -1.68943 |
| H | -5.44672 | -1.4454  | -3.24399 |
| H | -7.80613 | -1.92537 | -3.7599  |
| H | -10.1474 | -1.94298 | -3.08732 |
| H | -9.37452 | -1.89804 | 5.614321 |
| H | -8.49095 | -4.11678 | 5.060011 |
| H | -10.359  | 2.030405 | 3.168523 |
| H | -10.0033 | 0.380443 | 4.928285 |
| H | -3.16611 | -2.31597 | 1.546574 |
| H | -2.17999 | -2.23228 | 0.115137 |
| H | -11.2689 | -1.50462 | 0.235108 |
| H | -9.2065  | 1.719338 | -0.13287 |

|   |          |          |          |
|---|----------|----------|----------|
| H | -13.3267 | -1.41196 | 0.192099 |
| H | -10.0206 | 3.280443 | -1.22064 |
| H | -14.9863 | -2.57205 | -2.18835 |
| H | -17.2718 | -2.0543  | -2.90179 |
| H | -16.9973 | 1.749274 | -1.00505 |
| H | -14.6805 | 1.219063 | -0.29371 |
| H | -11.148  | 5.868838 | 0.025155 |
| H | -12.7961 | 7.481561 | -0.88917 |
| H | -14.3932 | 4.408734 | -3.36852 |
| H | -12.7602 | 2.824412 | -2.4644  |
| H | -2.68691 | 1.376155 | 0.962308 |
| H | -2.57329 | 0.281135 | -0.39618 |
| H | -6.49686 | -6.42192 | 3.061181 |
| H | -6.52103 | -5.17059 | 4.284966 |
| H | -2.08566 | -0.38223 | 2.529709 |
| H | -0.88849 | -0.31926 | 1.261063 |
| H | -5.44553 | -3.61275 | 2.554432 |
| H | -5.30477 | -4.99264 | 1.507478 |
| H | -4.06638 | -6.01115 | 3.735827 |
| H | -3.21942 | -5.21767 | 2.450125 |
| C | -15.5887 | 6.717213 | -3.57105 |
| H | -16.1257 | 7.638918 | -3.71333 |
| H | -15.1672 | 6.392058 | -4.51321 |
| H | -16.2597 | 5.958661 | -3.18996 |
| C | -19.3992 | -0.56395 | -3.11876 |
| H | -20.3118 | -0.00851 | -3.24821 |
| H | -18.962  | -0.7771  | -4.08558 |
| H | -19.6081 | -1.49065 | -2.60001 |
| O | -14.5609 | 7.015638 | -2.62421 |
| O | -18.5452 | 0.277887 | -2.34326 |
| H | -8.18966 | -3.03226 | 0.970691 |
| H | -6.64792 | -0.06446 | 1.319149 |
| C | 10.42645 | -8.24639 | -3.58927 |
| C | 10.95319 | -7.07956 | -3.18872 |
| C | 10.0124  | -6.1247  | -2.63506 |
| C | 8.741955 | -6.5773  | -2.6287  |
| S | 8.651381 | -8.26046 | -3.31079 |
| C | 7.515887 | -5.93337 | -2.17174 |

|   |          |          |          |
|---|----------|----------|----------|
| C | 6.774711 | -4.9666  | -2.75619 |
| C | 5.589974 | -4.62973 | -2.00029 |
| C | 5.41446  | -5.32078 | -0.85735 |
| S | 6.762717 | -6.48917 | -0.61838 |
| C | 12.62295 | -0.70458 | -1.28922 |
| C | 12.70583 | 0.602355 | -1.67222 |
| C | 11.61355 | 1.486231 | -1.52926 |
| C | 10.4228  | 1.009585 | -0.93382 |
| C | 10.35205 | -0.35273 | -0.55237 |
| C | 11.41243 | -1.19219 | -0.75185 |
| C | 11.68242 | 2.834711 | -1.96784 |
| C | 10.62233 | 3.665517 | -1.82638 |
| C | 9.427205 | 3.199558 | -1.21824 |
| C | 9.318953 | 1.912531 | -0.7619  |
| C | 6.08298  | -0.20068 | -2.71411 |
| C | 7.102556 | 0.463777 | -2.10384 |
| C | 7.010725 | 0.813168 | -0.73067 |
| C | 5.84361  | 0.461419 | -0.01467 |
| C | 4.783201 | -0.18328 | -0.69882 |
| C | 4.893216 | -0.50513 | -2.01584 |
| C | 8.081625 | 1.469819 | -0.0386  |
| C | 7.958406 | 1.693049 | 1.307186 |
| C | 6.794251 | 1.328429 | 2.022927 |
| C | 5.758743 | 0.743088 | 1.372584 |
| C | 10.46721 | -4.773   | -2.1464  |
| O | 11.22039 | -2.51211 | -0.41643 |
| O | 6.215687 | -0.56615 | -4.04221 |
| N | 8.370078 | 4.115298 | -0.97911 |
| N | 9.059057 | 2.246323 | 2.036488 |
| C | 7.714811 | 4.879401 | -1.87833 |
| C | 9.106425 | 3.443461 | 2.647119 |
| N | 6.784978 | 5.672725 | -1.3123  |
| S | 8.02463  | 4.836517 | -3.59048 |
| N | 10.24198 | 3.678417 | 3.325172 |
| S | 7.804932 | 4.609365 | 2.556084 |
| C | 5.908504 | 6.578138 | -1.98328 |
| C | 10.58343 | 4.881821 | 4.022491 |
| C | 4.85671  | 6.113087 | -2.75007 |

|   |          |          |          |
|---|----------|----------|----------|
| C | 3.981555 | 7.002757 | -3.35881 |
| C | 4.159818 | 8.366621 | -3.18361 |
| C | 5.210468 | 8.839736 | -2.40739 |
| C | 6.082893 | 7.947136 | -1.81696 |
| C | 10.27997 | 5.01452  | 5.372823 |
| C | 10.65157 | 6.151787 | 6.058558 |
| C | 11.32883 | 7.170485 | 5.395548 |
| C | 11.63289 | 7.045517 | 4.048722 |
| C | 11.25578 | 5.894875 | 3.367615 |
| C | 12.16596 | -3.55409 | -0.71095 |
| C | 6.107999 | -1.96202 | -4.39674 |
| C | 11.3981  | -4.84651 | -0.92144 |
| C | 7.32792  | -2.76272 | -3.94708 |
| C | 7.118499 | -4.29503 | -4.0655  |
| H | 12.00045 | -6.86524 | -3.27673 |
| H | 4.895993 | -3.88274 | -2.32395 |
| H | 13.47196 | -1.34554 | -1.4034  |
| H | 13.61837 | 0.974533 | -2.09833 |
| H | 12.58911 | 3.18851  | -2.4205  |
| H | 10.66062 | 4.676644 | -2.17002 |
| H | 3.888839 | -0.42396 | -0.157   |
| H | 4.082208 | -0.979   | -2.53194 |
| H | 6.74612  | 1.537497 | 3.071463 |
| H | 4.868238 | 0.470456 | 1.905457 |
| H | 9.616941 | -4.15363 | -1.90378 |
| H | 10.99366 | -4.27802 | -2.96029 |
| H | 8.064236 | 4.171718 | -0.02945 |
| H | 9.884237 | 1.686981 | 2.039116 |
| H | 6.698002 | 5.642924 | -0.31863 |
| H | 10.92289 | 2.951454 | 3.357812 |
| H | 4.729799 | 5.058474 | -2.88744 |
| H | 3.180484 | 6.621228 | -3.95752 |
| H | 5.32757  | 9.897516 | -2.29074 |
| H | 6.905739 | 8.306553 | -1.23038 |
| H | 9.744891 | 4.2324   | 5.874    |
| H | 10.42505 | 6.278804 | 7.096986 |
| H | 12.14888 | 7.821596 | 3.522543 |
| H | 11.4777  | 5.794586 | 2.32338  |

|   |          |          |          |
|---|----------|----------|----------|
| H | 12.86182 | -3.63559 | 0.114644 |
| H | 12.71987 | -3.31277 | -1.60902 |
| H | 6.015551 | -1.963   | -5.47116 |
| H | 5.195834 | -2.37049 | -3.98186 |
| H | 10.82056 | -5.07762 | -0.03479 |
| H | 12.1243  | -5.64451 | -1.04651 |
| H | 7.569921 | -2.50599 | -2.92321 |
| H | 8.175231 | -2.45633 | -4.5489  |
| H | 6.329534 | -4.50279 | -4.78551 |
| H | 8.012609 | -4.75302 | -4.46306 |
| C | 12.30108 | 9.406145 | 5.593103 |
| H | 12.40785 | 10.10353 | 6.405358 |
| H | 13.27707 | 9.151481 | 5.201102 |
| H | 11.69464 | 9.845196 | 4.811957 |
| C | 2.265184 | 8.975758 | -4.60376 |
| H | 1.82576  | 9.910478 | -4.90625 |
| H | 2.622359 | 8.441773 | -5.47468 |
| H | 1.526278 | 8.377655 | -4.08616 |
| O | 11.65916 | 8.25951  | 6.156404 |
| O | 3.344908 | 9.323067 | -3.73617 |
| H | 7.973864 | 0.711257 | -2.67274 |
| H | 9.453445 | -0.76122 | -0.13912 |
| C | 11.11649 | -9.42488 | -4.19469 |
| H | 10.99056 | -10.3126 | -3.58546 |
| H | 10.72959 | -9.64626 | -5.18279 |
| H | 12.17733 | -9.22745 | -4.28581 |
| C | -4.08051 | -2.08826 | 7.409881 |
| H | -4.19445 | -1.01481 | 7.311368 |
| H | -5.04414 | -2.50486 | 7.675224 |
| H | -3.3961  | -2.2736  | 8.22972  |
| C | 2.189346 | -4.65337 | 1.368672 |
| C | 3.008204 | -5.5123  | 2.010203 |
| S | 2.904019 | -4.17505 | -0.222   |
| C | 4.212773 | -5.83193 | 1.302447 |
| H | 2.778127 | -5.92483 | 2.971104 |
| C | 4.3407   | -5.22388 | 0.105056 |
| H | 4.952464 | -6.49854 | 1.695864 |

Total energy = -8677.403739 Hartree



**PT2<sub>6-mer</sub>**

| Symbol | X        | Y        | Z        |
|--------|----------|----------|----------|
| C      | 1.12715  | -2.9577  | 2.851872 |
| C      | 2.190167 | -3.08774 | 2.033654 |
| C      | 3.451933 | -2.64791 | 2.58006  |
| C      | 3.349878 | -2.16967 | 3.838525 |
| S      | 1.634672 | -2.24451 | 4.425447 |
| C      | 4.383778 | -1.6666  | 4.736819 |
| C      | 4.956325 | -0.44616 | 4.803533 |
| C      | 5.92813  | -0.33594 | 5.874407 |
| C      | 6.10066  | -1.44038 | 6.616268 |
| S      | 5.03564  | -2.76239 | 6.031693 |
| C      | 7.199719 | -2.2665  | -1.12769 |
| C      | 7.621238 | -1.36155 | -2.05627 |
| C      | 8.735877 | -0.52525 | -1.82302 |
| C      | 9.42775  | -0.63347 | -0.59584 |
| C      | 8.980829 | -1.58757 | 0.351273 |
| C      | 7.896113 | -2.37878 | 0.095892 |
| C      | 9.161504 | 0.433506 | -2.77649 |
| C      | 10.23577 | 1.224703 | -2.54153 |
| C      | 10.96273 | 1.096157 | -1.32901 |
| C      | 10.56131 | 0.218116 | -0.35202 |
| C      | 8.843882 | 2.143381 | 3.075639 |
| C      | 9.399914 | 1.536335 | 1.991623 |
| C      | 10.62067 | 0.818802 | 2.109826 |
| C      | 11.23662 | 0.743449 | 3.378515 |
| C      | 10.63847 | 1.405801 | 4.479989 |
| C      | 9.474232 | 2.096266 | 4.338887 |
| C      | 11.24053 | 0.172172 | 0.985815 |
| C      | 12.42302 | -0.50097 | 1.170027 |
| C      | 13.00763 | -0.61414 | 2.456625 |
| C      | 12.43396 | -0.00103 | 3.521191 |
| C      | 4.730488 | -2.7574  | 1.787226 |
| O      | 7.526499 | -3.23848 | 1.10384  |
| O      | 7.664528 | 2.848516 | 2.91519  |
| N      | 12.06598 | 1.949906 | -1.07247 |
| N      | 13.01909 | -1.16037 | 0.063673 |

|   |          |          |          |
|---|----------|----------|----------|
| C | 13.08724 | 2.292658 | -1.89463 |
| C | 14.31753 | -1.14778 | -0.32289 |
| N | 13.96222 | 3.143874 | -1.33711 |
| S | 13.28906 | 1.684804 | -3.51812 |
| N | 14.56045 | -1.88338 | -1.41844 |
| S | 15.56914 | -0.25063 | 0.4966   |
| C | 15.15014 | 3.660978 | -1.94834 |
| C | 15.82226 | -2.02805 | -2.08181 |
| C | 15.09667 | 4.835937 | -2.67181 |
| C | 16.24989 | 5.37267  | -3.23084 |
| C | 17.45869 | 4.717305 | -3.05441 |
| C | 17.51573 | 3.534955 | -2.32438 |
| C | 16.36525 | 3.006868 | -1.77454 |
| C | 16.65921 | -3.08766 | -1.75176 |
| C | 17.85399 | -3.26163 | -2.41912 |
| C | 18.22063 | -2.37049 | -3.42241 |
| C | 17.39041 | -1.3114  | -3.75461 |
| C | 16.18766 | -1.14419 | -3.07882 |
| C | 6.580351 | -4.31849 | 0.986397 |
| C | 6.487148 | 2.450289 | 3.652943 |
| C | 5.437997 | -4.11182 | 1.969886 |
| C | 5.833921 | 1.212508 | 3.04777  |
| C | 4.628454 | 0.701903 | 3.878582 |
| H | 2.111856 | -3.4917  | 1.043862 |
| H | 6.472492 | 0.564683 | 6.071365 |
| H | 6.342336 | -2.87094 | -1.3347  |
| H | 7.094372 | -1.27054 | -2.98733 |
| H | 8.61361  | 0.534091 | -3.69389 |
| H | 10.55203 | 1.945196 | -3.26131 |
| H | 11.12783 | 1.362046 | 5.4345   |
| H | 9.039758 | 2.6186   | 5.167936 |
| H | 13.90848 | -1.17499 | 2.568151 |
| H | 12.88403 | -0.08224 | 4.492024 |
| H | 5.414864 | -1.97161 | 2.071332 |
| H | 4.495437 | -2.60655 | 0.73716  |
| H | 12.14211 | 2.23839  | -0.12187 |
| H | 12.36678 | -1.57871 | -0.56234 |
| H | 13.82827 | 3.394969 | -0.38218 |

|   |          |          |          |
|---|----------|----------|----------|
| H | 13.78913 | -2.33238 | -1.86139 |
| H | 14.15507 | 5.329419 | -2.81103 |
| H | 16.18747 | 6.281578 | -3.7927  |
| H | 18.46279 | 3.05029  | -2.20465 |
| H | 16.398   | 2.089692 | -1.22052 |
| H | 16.375   | -3.76189 | -0.96803 |
| H | 18.51742 | -4.06725 | -2.18051 |
| H | 17.65882 | -0.61376 | -4.52065 |
| H | 15.54373 | -0.32223 | -3.32225 |
| H | 7.123224 | -5.22391 | 1.216607 |
| H | 6.209523 | -4.39881 | -0.02494 |
| H | 5.828627 | 3.302597 | 3.594631 |
| H | 6.748382 | 2.294511 | 4.691045 |
| H | 5.818696 | -4.17896 | 2.981265 |
| H | 4.731037 | -4.92687 | 1.839338 |
| H | 6.571055 | 0.425211 | 2.944531 |
| H | 5.50757  | 1.465264 | 2.045729 |
| H | 4.216679 | 1.520657 | 4.465457 |
| H | 3.839928 | 0.39021  | 3.208376 |
| C | 19.94382 | -1.75595 | -5.04382 |
| H | 20.8955  | -2.17588 | -5.3197  |
| H | 19.29242 | -1.73117 | -5.90765 |
| H | 20.08378 | -0.75284 | -4.66304 |
| C | 18.73331 | 6.355747 | -4.34673 |
| H | 19.77113 | 6.455031 | -4.61366 |
| H | 18.13253 | 6.274551 | -5.24329 |
| H | 18.42085 | 7.219795 | -3.77461 |
| O | 19.42296 | -2.62063 | -4.03242 |
| O | 18.65151 | 5.164127 | -3.56399 |
| H | 8.895809 | 1.607268 | 1.051384 |
| H | 9.475517 | -1.70111 | 1.292384 |
| C | -11.9246 | -8.3616  | -3.75837 |
| C | -12.1799 | -7.06435 | -3.98509 |
| C | -11.326  | -6.12581 | -3.28268 |
| C | -10.4112 | -6.72943 | -2.49687 |
| S | -10.557  | -8.53861 | -2.60635 |
| C | -9.38691 | -6.15382 | -1.63308 |
| C | -9.50213 | -5.57937 | -0.41565 |

|   |          |          |          |
|---|----------|----------|----------|
| C | -8.23084 | -5.17392 | 0.1394   |
| C | -7.15397 | -5.4307  | -0.62824 |
| S | -7.65446 | -6.22385 | -2.16475 |
| C | -13.0063 | -0.26637 | -4.16353 |
| C | -13.5824 | 0.81302  | -3.55971 |
| C | -12.9291 | 1.518579 | -2.52525 |
| C | -11.6284 | 1.118159 | -2.14124 |
| C | -11.0513 | -0.01133 | -2.77189 |
| C | -11.7338 | -0.70105 | -3.73492 |
| C | -13.5451 | 2.613995 | -1.8648  |
| C | -12.9041 | 3.274877 | -0.87165 |
| C | -11.5929 | 2.888672 | -0.48849 |
| C | -10.9496 | 1.850422 | -1.10865 |
| C | -9.89078 | -1.26317 | 1.709075 |
| C | -10.2279 | -0.28724 | 0.821714 |
| C | -9.22181 | 0.516354 | 0.223218 |
| C | -7.87041 | 0.285072 | 0.567962 |
| C | -7.56525 | -0.70391 | 1.536051 |
| C | -8.54689 | -1.4593  | 2.098153 |
| C | -9.5301  | 1.522503 | -0.75119 |
| C | -8.49996 | 2.193731 | -1.35493 |
| C | -7.14824 | 1.950055 | -1.01758 |
| C | -6.84569 | 1.031323 | -0.06763 |
| C | -11.5017 | -4.63733 | -3.44468 |
| O | -11.1198 | -1.82593 | -4.23453 |
| O | -10.8867 | -2.06053 | 2.245177 |
| N | -10.8977 | 3.663567 | 0.475644 |
| N | -8.7813  | 3.121574 | -2.40826 |
| C | -11.2727 | 3.942633 | 1.741857 |
| C | -8.58702 | 4.45199  | -2.38981 |
| N | -10.3964 | 4.738434 | 2.384473 |
| S | -12.7265 | 3.329403 | 2.476208 |
| N | -8.87195 | 5.072443 | -3.54685 |
| S | -8.02447 | 5.311567 | -0.97359 |
| C | -10.4851 | 5.192005 | 3.735426 |
| C | -8.80699 | 6.48125  | -3.79559 |
| C | -10.2519 | 4.329597 | 4.79008  |
| C | -10.2922 | 4.790603 | 6.099185 |

|   |          |          |          |
|---|----------|----------|----------|
| C | -10.5572 | 6.129129 | 6.345506 |
| C | -10.7853 | 7.002247 | 5.289079 |
| C | -10.755  | 6.531253 | 3.991504 |
| C | -7.64304 | 7.045655 | -4.30521 |
| C | -7.5939  | 8.393611 | -4.59223 |
| C | -8.71161 | 9.191109 | -4.36718 |
| C | -9.87482 | 8.635229 | -3.85732 |
| C | -9.91451 | 7.275831 | -3.57358 |
| C | -11.7622 | -2.75476 | -5.1241  |
| C | -10.8153 | -3.49004 | 2.053272 |
| C | -11.1865 | -4.13552 | -4.86644 |
| C | -11.1352 | -3.89009 | 0.61493  |
| C | -10.8079 | -5.37678 | 0.317351 |
| H | -12.9669 | -6.74253 | -4.6389  |
| H | -8.14687 | -4.70361 | 1.096668 |
| H | -13.5248 | -0.77325 | -4.95023 |
| H | -14.5581 | 1.137206 | -3.8691  |
| H | -14.5334 | 2.910358 | -2.16062 |
| H | -13.368  | 4.08884  | -0.35761 |
| H | -6.54051 | -0.85481 | 1.81621  |
| H | -8.31234 | -2.19456 | 2.841818 |
| H | -6.38336 | 2.512762 | -1.51133 |
| H | -5.82382 | 0.846648 | 0.202473 |
| H | -10.8814 | -4.10495 | -2.73947 |
| H | -12.5337 | -4.38975 | -3.20378 |
| H | -10.0108 | 4.015158 | 0.178172 |
| H | -9.21215 | 2.723156 | -3.21412 |
| H | -9.60191 | 5.057252 | 1.871694 |
| H | -9.15616 | 4.509514 | -4.31853 |
| H | -10.0555 | 3.295339 | 4.592349 |
| H | -10.1189 | 4.103321 | 6.901234 |
| H | -10.9909 | 8.030071 | 5.507087 |
| H | -10.9463 | 7.196583 | 3.172366 |
| H | -6.78074 | 6.428379 | -4.46211 |
| H | -6.70789 | 8.851608 | -4.98081 |
| H | -10.7418 | 9.235254 | -3.67365 |
| H | -10.8067 | 6.839745 | -3.16912 |
| H | -11.588  | -2.43594 | -6.14414 |

|   |          |          |          |
|---|----------|----------|----------|
| H | -12.8291 | -2.76901 | -4.94252 |
| H | -11.5417 | -3.89338 | 2.740763 |
| H | -9.8379  | -3.8462  | 2.351526 |
| H | -10.1146 | -4.11998 | -5.021   |
| H | -11.6061 | -4.81075 | -5.60663 |
| H | -10.5864 | -3.25214 | -0.06678 |
| H | -12.1865 | -3.69847 | 0.435733 |
| H | -10.7796 | -5.93953 | 1.248212 |
| H | -11.6034 | -5.81223 | -0.26984 |
| C | -9.61662 | 11.46204 | -4.44572 |
| H | -9.22015 | 12.41224 | -4.75791 |
| H | -10.4958 | 11.22455 | -5.03023 |
| H | -9.87331 | 11.5006  | -3.39532 |
| C | -10.4514 | 5.884341 | 8.775683 |
| H | -10.5666 | 6.563242 | 9.602819 |
| H | -11.2091 | 5.113469 | 8.828208 |
| H | -9.46819 | 5.432991 | 8.810313 |
| O | -8.57152 | 10.51575 | -4.68318 |
| O | -10.6103 | 6.681013 | 7.601249 |
| H | -11.2593 | -0.14108 | 0.57893  |
| H | -10.0876 | -0.37164 | -2.47748 |
| C | -12.6135 | -9.56212 | -4.32018 |
| H | -11.9263 | -10.1866 | -4.87957 |
| H | -13.0491 | -10.1719 | -3.53693 |
| H | -13.4086 | -9.25514 | -4.98822 |
| C | 7.015192 | -1.65004 | 7.77855  |
| H | 7.731833 | -2.43875 | 7.580109 |
| H | 7.565776 | -0.74101 | 7.98605  |
| H | 6.464515 | -1.92158 | 8.671812 |
| C | -0.25478 | -3.30045 | 2.606109 |
| C | -1.30127 | -3.28498 | 3.457584 |
| S | -0.78771 | -3.84415 | 0.965768 |
| C | -2.54672 | -3.69684 | 2.881259 |
| H | -1.20886 | -2.99691 | 4.484654 |
| C | -2.4783  | -4.03532 | 1.576429 |
| H | -3.45514 | -3.742   | 3.446287 |
| C | -3.52539 | -4.4943  | 0.695773 |
| C | -3.435   | -4.97018 | -0.56387 |

|   |          |          |          |
|---|----------|----------|----------|
| S | -5.24919 | -4.48067 | 1.239479 |
| C | -4.68689 | -5.34255 | -1.15294 |
| H | -2.50312 | -5.06894 | -1.08189 |
| C | -5.76082 | -5.15929 | -0.35702 |
| H | -4.76201 | -5.73549 | -2.14602 |

Total energy = -9227.447478 Hartree

**PT1<sub>5-mer</sub> + isophthalate**

| Symbol | X        | Y        | Z        |
|--------|----------|----------|----------|
| C      | 3.035864 | -3.9946  | -3.06686 |
| C      | 2.193864 | -3.36356 | -2.22812 |
| C      | 0.799787 | -3.39121 | -2.61524 |
| C      | 0.583073 | -4.03626 | -3.78166 |
| S      | 2.137684 | -4.67529 | -4.47597 |
| C      | -0.65912 | -4.2754  | -4.50531 |
| C      | -1.47214 | -3.41215 | -5.15089 |
| C      | -2.61174 | -4.0631  | -5.76981 |
| C      | -2.67749 | -5.39294 | -5.61202 |
| S      | -1.28432 | -5.97896 | -4.6437  |
| C      | -2.81711 | -0.21838 | 1.183654 |
| C      | -3.59953 | 0.885087 | 1.34713  |
| C      | -4.872   | 0.973241 | 0.731852 |
| C      | -5.35051 | -0.11757 | -0.03382 |
| C      | -4.51561 | -1.251   | -0.1938  |
| C      | -3.27157 | -1.28704 | 0.378085 |
| C      | -5.66343 | 2.140177 | 0.850281 |
| C      | -6.8849  | 2.227582 | 0.262095 |
| C      | -7.39446 | 1.121445 | -0.45611 |
| C      | -6.65797 | -0.02782 | -0.62442 |
| C      | -5.47918 | -0.75449 | -4.70847 |
| C      | -5.84644 | -0.53402 | -3.41648 |
| C      | -6.80173 | -1.37552 | -2.78266 |
| C      | -7.34813 | -2.45038 | -3.52027 |
| C      | -6.97326 | -2.62133 | -4.8765  |
| C      | -6.06892 | -1.79294 | -5.46484 |
| C      | -7.2085  | -1.17714 | -1.4206  |
| C      | -8.09865 | -2.06    | -0.85529 |
| C      | -8.5922  | -3.17182 | -1.58131 |
| C      | -8.23996 | -3.34408 | -2.87978 |
| C      | -0.25422 | -2.75658 | -1.74359 |
| O      | -2.50837 | -2.39164 | 0.105597 |
| O      | -4.53087 | 0.067433 | -5.28858 |
| N      | -8.66132 | 1.210058 | -1.10434 |
| N      | -8.44585 | -1.87939 | 0.509315 |



|   |          |          |          |
|---|----------|----------|----------|
| C | -9.84237 | 1.650147 | -0.63101 |
| C | -9.63724 | -2.0092  | 1.12891  |
| N | -10.844  | 1.564978 | -1.53133 |
| S | -10.1056 | 2.267716 | 0.979358 |
| N | -9.58952 | -1.71886 | 2.441361 |
| S | -11.1261 | -2.49152 | 0.347537 |
| C | -12.2117 | 1.918742 | -1.31393 |
| C | -10.6923 | -1.7203  | 3.35255  |
| C | -12.6623 | 3.175087 | -1.66758 |
| C | -14.0009 | 3.515872 | -1.51139 |
| C | -14.8823 | 2.580637 | -0.99376 |
| C | -14.433  | 1.314922 | -0.63456 |
| C | -13.1019 | 0.985182 | -0.79249 |
| C | -10.9463 | -2.84384 | 4.129831 |
| C | -11.9742 | -2.83417 | 5.051347 |
| C | -12.7572 | -1.69514 | 5.197443 |
| C | -12.5104 | -0.57186 | 4.424449 |
| C | -11.473  | -0.58971 | 3.500096 |
| C | -1.16573 | -2.58439 | 0.611155 |
| C | -3.30964 | -0.51842 | -5.80127 |
| C | -0.41359 | -3.45247 | -0.37824 |
| C | -2.41172 | -1.06546 | -4.69463 |
| C | -1.24252 | -1.92126 | -5.24961 |
| H | 2.521512 | -2.88844 | -1.32341 |
| H | -3.35772 | -3.5232  | -6.31609 |
| H | -1.86548 | -0.24976 | 1.668155 |
| H | -3.22723 | 1.693712 | 1.949422 |
| H | -5.26994 | 2.97133  | 1.402827 |
| H | -7.47408 | 3.11339  | 0.345071 |
| H | -7.41811 | -3.42236 | -5.43673 |
| H | -5.8011  | -1.9138  | -6.49574 |
| H | -9.25151 | -3.85674 | -1.09841 |
| H | -8.62493 | -4.18034 | -3.43206 |
| H | -1.20867 | -2.7481  | -2.24774 |
| H | 0.027347 | -1.72053 | -1.57418 |
| H | -8.67125 | 0.797542 | -2.01077 |
| H | -7.70504 | -1.4874  | 1.049218 |
| H | -10.641  | 1.155377 | -2.41628 |

|   |          |          |          |
|---|----------|----------|----------|
| H | -8.72772 | -1.38364 | 2.813407 |
| H | -11.9676 | 3.894856 | -2.05352 |
| H | -14.3285 | 4.497108 | -1.78698 |
| H | -15.1354 | 0.614628 | -0.23122 |
| H | -12.7414 | 0.017978 | -0.50202 |
| H | -10.3424 | -3.72039 | 4.001889 |
| H | -12.1895 | -3.68848 | 5.659865 |
| H | -13.1055 | 0.312521 | 4.521537 |
| H | -11.2785 | 0.269413 | 2.889188 |
| H | -1.2277  | -3.04898 | 1.58545  |
| H | -0.66062 | -1.63711 | 0.715138 |
| H | -2.82846 | 0.289832 | -6.32865 |
| H | -3.55988 | -1.28767 | -6.52085 |
| H | -0.92727 | -4.39847 | -0.50711 |
| H | 0.558088 | -3.65855 | 0.054338 |
| H | -3.00035 | -1.65695 | -4.00492 |
| H | -2.02297 | -0.22987 | -4.12582 |
| H | -1.06407 | -1.66227 | -6.2922  |
| H | -0.33272 | -1.67438 | -4.72311 |
| C | -14.6406 | -0.6755  | 6.371938 |
| H | -15.3178 | -1.00752 | 7.140468 |
| H | -14.0989 | 0.195972 | 6.716384 |
| H | -15.1979 | -0.4264  | 5.478124 |
| C | -16.7957 | 4.09805  | -1.06919 |
| H | -17.8362 | 4.011247 | -0.80633 |
| H | -16.3307 | 4.866959 | -0.46557 |
| H | -16.7069 | 4.35619  | -2.11694 |
| O | -13.7575 | -1.7715  | 6.138639 |
| O | -16.224  | 2.819204 | -0.80313 |
| H | -5.38123 | 0.264073 | -2.87736 |
| H | -4.82496 | -2.08688 | -0.7856  |
| C | 12.95579 | -4.85394 | 2.58668  |
| C | 12.0605  | -4.1004  | 3.242398 |
| C | 10.97319 | -3.577   | 2.438512 |
| C | 11.05266 | -3.94017 | 1.141967 |
| S | 12.5134  | -4.98183 | 0.847341 |
| C | 10.11915 | -3.63459 | 0.064638 |
| C | 9.949529 | -2.48805 | -0.62904 |

|   |          |          |          |
|---|----------|----------|----------|
| C | 8.815702 | -2.53698 | -1.52921 |
| C | 8.141551 | -3.70037 | -1.53932 |
| S | 8.888752 | -4.8772  | -0.40114 |
| C | 6.829965 | 0.09906  | 5.041944 |
| C | 6.482704 | 1.408144 | 5.210642 |
| C | 5.995638 | 2.185481 | 4.139833 |
| C | 5.772388 | 1.565562 | 2.888421 |
| C | 6.131809 | 0.204263 | 2.73442  |
| C | 6.693574 | -0.48998 | 3.769494 |
| C | 5.76142  | 3.578632 | 4.282653 |
| C | 5.406581 | 4.323658 | 3.212713 |
| C | 5.192741 | 3.718503 | 1.944499 |
| C | 5.281991 | 2.358858 | 1.790581 |
| C | 7.889787 | 1.842063 | -1.63662 |
| C | 7.079278 | 2.000451 | -0.55505 |
| C | 5.698351 | 1.674792 | -0.64182 |
| C | 5.192416 | 1.205248 | -1.87463 |
| C | 6.052769 | 1.134318 | -2.99773 |
| C | 7.374618 | 1.438366 | -2.88634 |
| C | 4.836762 | 1.717695 | 0.50686  |
| C | 3.572429 | 1.193488 | 0.402446 |
| C | 3.065894 | 0.76064  | -0.84873 |
| C | 3.840753 | 0.786992 | -1.95793 |
| C | 9.88191  | -2.72031 | 3.03262  |
| O | 7.15739  | -1.76403 | 3.483563 |
| O | 9.260346 | 2.063688 | -1.52137 |
| N | 4.848127 | 4.572053 | 0.857626 |
| N | 2.704638 | 1.105338 | 1.531881 |
| C | 5.691105 | 5.46806  | 0.285881 |
| C | 2.284321 | -0.04321 | 2.106502 |
| N | 5.118705 | 6.176887 | -0.68931 |
| S | 7.354829 | 5.654518 | 0.845341 |
| N | 1.447039 | 0.148552 | 3.128605 |
| S | 2.777357 | -1.62879 | 1.49921  |
| C | 5.639326 | 7.176599 | -1.54186 |
| C | 0.828293 | -0.77457 | 4.00368  |
| C | 6.935461 | 7.196559 | -2.03088 |
| C | 7.342586 | 8.195819 | -2.91096 |

|   |          |          |          |
|---|----------|----------|----------|
| C | 6.446742 | 9.165769 | -3.31941 |
| C | 5.138636 | 9.137289 | -2.85683 |
| C | 4.735465 | 8.153336 | -1.9761  |
| C | 1.447295 | -1.92083 | 4.501231 |
| C | 0.784751 | -2.73382 | 5.402235 |
| C | -0.4919  | -2.40802 | 5.836186 |
| C | -1.10513 | -1.2587  | 5.369994 |
| C | -0.44429 | -0.44522 | 4.456575 |
| C | 7.785804 | -2.61485 | 4.444856 |
| C | 10.12029 | 0.913385 | -1.59643 |
| C | 8.75226  | -3.52443 | 3.702167 |
| C | 10.07868 | 0.068034 | -0.3258  |
| C | 10.83796 | -1.27231 | -0.49207 |
| H | 12.14185 | -3.8936  | 4.292136 |
| H | 8.506214 | -1.70071 | -2.12235 |
| H | 7.202596 | -0.46041 | 5.87467  |
| H | 6.600476 | 1.871625 | 6.172535 |
| H | 5.905908 | 4.036173 | 5.243245 |
| H | 5.278497 | 5.382854 | 3.288422 |
| H | 5.645506 | 0.818008 | -3.93947 |
| H | 8.030706 | 1.388257 | -3.7337  |
| H | 2.053551 | 0.416706 | -0.88752 |
| H | 3.450482 | 0.466478 | -2.90516 |
| H | 9.441929 | -2.09252 | 2.273224 |
| H | 10.32966 | -2.0566  | 3.768689 |
| H | 3.896744 | 4.582465 | 0.528173 |
| H | 2.313402 | 1.954833 | 1.899573 |
| H | 4.108865 | 6.037808 | -0.78192 |
| H | 1.109261 | 1.109358 | 3.235294 |
| H | 7.632959 | 6.449481 | -1.7242  |
| H | 8.354718 | 8.187733 | -3.26286 |
| H | 4.451326 | 9.886653 | -3.19436 |
| H | 3.715644 | 8.123002 | -1.63638 |
| H | 2.431854 | -2.17643 | 4.177415 |
| H | 1.248007 | -3.62112 | 5.784876 |
| H | -2.08399 | -0.97329 | 5.698127 |
| H | -0.91477 | 0.458243 | 4.111197 |
| H | 7.026232 | -3.18666 | 4.964251 |

|   |          |          |          |
|---|----------|----------|----------|
| H | 8.333857 | -2.03075 | 5.173761 |
| H | 11.11025 | 1.313502 | -1.75854 |
| H | 9.85275  | 0.316678 | -2.46231 |
| H | 8.211541 | -4.0876  | 2.952306 |
| H | 9.166368 | -4.23747 | 4.411742 |
| H | 9.049252 | -0.11777 | -0.04837 |
| H | 10.51045 | 0.645734 | 0.482558 |
| H | 11.47995 | -1.21844 | -1.37055 |
| H | 11.50163 | -1.42632 | 0.347036 |
| C | -2.38263 | -3.04415 | 7.240971 |
| H | -2.59664 | -3.86334 | 7.907895 |
| H | -2.43205 | -2.11022 | 7.78732  |
| H | -3.11245 | -3.02878 | 6.440808 |
| C | 8.078352 | 10.30795 | -4.72856 |
| H | 8.065022 | 11.17877 | -5.36421 |
| H | 8.814848 | 10.44376 | -3.94544 |
| H | 8.341345 | 9.436432 | -5.3164  |
| O | -1.07241 | -3.28235 | 6.74101  |
| O | 6.767764 | 10.19603 | -4.19347 |
| H | 7.494957 | 2.363514 | 0.361217 |
| H | 5.991636 | -0.29535 | 1.799121 |
| C | 14.17716 | -5.52911 | 3.119711 |
| H | 14.1321  | -6.60296 | 2.974789 |
| H | 15.07599 | -5.16876 | 2.631305 |
| H | 14.27267 | -5.33741 | 4.18172  |
| C | -3.71626 | -6.33997 | -6.11715 |
| H | -4.21154 | -6.85483 | -5.30144 |
| H | -4.4693  | -5.79962 | -6.67819 |
| H | -3.28539 | -7.09247 | -6.76863 |
| C | 4.464476 | -4.18592 | -2.92855 |
| C | 5.245352 | -5.1727  | -3.4215  |
| S | 5.433422 | -3.0491  | -1.92604 |
| C | 6.619461 | -5.0953  | -3.01551 |
| H | 4.862088 | -5.96248 | -4.03506 |
| C | 6.903017 | -4.04399 | -2.22036 |
| H | 7.356143 | -5.81816 | -3.30297 |
| C | -0.68267 | 4.372636 | 1.896981 |
| C | 0.39779  | 4.82116  | 1.152268 |

|   |          |          |          |
|---|----------|----------|----------|
| C | 0.30863  | 5.958318 | 0.364955 |
| C | -0.88462 | 6.669925 | 0.337284 |
| C | -1.97427 | 6.232039 | 1.078989 |
| C | -1.87678 | 5.082989 | 1.852312 |
| H | 1.316273 | 4.280973 | 1.181734 |
| H | -0.93867 | 7.554818 | -0.26526 |
| H | -2.89614 | 6.784017 | 1.05379  |
| H | -2.70984 | 4.730935 | 2.42855  |
| C | 1.502345 | 6.409683 | -0.43389 |
| O | 1.443691 | 7.505556 | -1.03262 |
| C | -0.54691 | 3.122267 | 2.716255 |
| O | -1.58847 | 2.574373 | 3.16447  |
| O | 0.636746 | 2.679747 | 2.889226 |
| O | 2.510482 | 5.620446 | -0.43218 |

Total energy = -9282.018466 Hartree

**PT2<sub>6-mer</sub> + isophthalate**

| Symbol | X        | Y        | Z        |
|--------|----------|----------|----------|
| C      | -1.04644 | 5.225229 | 2.220678 |
| C      | -0.32395 | 4.13274  | 1.910608 |
| C      | 1.108152 | 4.269502 | 2.046745 |
| C      | 1.482561 | 5.497059 | 2.466979 |
| S      | 0.035226 | 6.566711 | 2.744426 |
| C      | 2.813332 | 6.040287 | 2.709985 |
| C      | 3.774588 | 6.405884 | 1.835511 |
| C      | 4.960086 | 6.932352 | 2.485183 |
| C      | 4.915996 | 6.974898 | 3.825024 |
| S      | 3.346642 | 6.341507 | 4.421971 |
| C      | 3.98039  | -0.53914 | -0.33775 |
| C      | 4.763741 | -0.98045 | -1.36095 |
| C      | 6.133324 | -0.63412 | -1.46145 |
| C      | 6.71428  | 0.16558  | -0.44904 |
| C      | 5.886209 | 0.6267   | 0.604932 |
| C      | 4.55586  | 0.304793 | 0.643574 |
| C      | 6.92873  | -1.05178 | -2.55379 |
| C      | 8.244374 | -0.72394 | -2.63899 |
| C      | 8.849287 | 0.021324 | -1.59987 |
| C      | 8.113658 | 0.47984  | -0.53071 |
| C      | 7.753842 | 4.777746 | -0.40375 |
| C      | 7.861718 | 3.421316 | -0.43557 |
| C      | 8.626837 | 2.73409  | 0.545826 |
| C      | 9.258936 | 3.488938 | 1.559949 |
| C      | 9.156315 | 4.902338 | 1.535919 |
| C      | 8.431023 | 5.537907 | 0.576383 |
| C      | 8.759432 | 1.304349 | 0.546494 |
| C      | 9.473037 | 0.703876 | 1.554758 |
| C      | 10.054   | 1.462069 | 2.60063  |
| C      | 9.962882 | 2.81497  | 2.588107 |
| C      | 2.029576 | 3.132979 | 1.677107 |
| O      | 3.829626 | 0.859837 | 1.662538 |
| O      | 6.985195 | 5.414187 | -1.36196 |
| N      | 10.22242 | 0.392384 | -1.67682 |
| N      | 9.55042  | -0.7142  | 1.578089 |

|   |          |          |          |
|---|----------|----------|----------|
| C | 11.30249 | -0.31289 | -2.06837 |
| C | 10.62939 | -1.50225 | 1.765216 |
| N | 12.45477 | 0.381515 | -1.96439 |
| S | 11.28055 | -1.95872 | -2.64911 |
| N | 10.35704 | -2.81568 | 1.685756 |
| S | 12.24343 | -0.90388 | 2.072196 |
| C | 13.76386 | -0.09597 | -2.28353 |
| C | 11.30202 | -3.88639 | 1.777547 |
| C | 14.28304 | 0.110277 | -3.54629 |
| C | 15.57377 | -0.30209 | -3.85609 |
| C | 16.33863 | -0.92401 | -2.88247 |
| C | 15.82047 | -1.13383 | -1.60967 |
| C | 14.53641 | -0.72374 | -1.31161 |
| C | 11.49    | -4.54266 | 2.987879 |
| C | 12.36003 | -5.61119 | 3.070929 |
| C | 13.05113 | -6.02636 | 1.938587 |
| C | 12.86955 | -5.37471 | 0.729052 |
| C | 11.98993 | -4.30186 | 0.653396 |
| C | 2.410957 | 0.632201 | 1.85658  |
| C | 5.869696 | 6.233749 | -0.93813 |
| C | 1.840693 | 1.865774 | 2.533117 |
| C | 4.737586 | 5.411736 | -0.32887 |
| C | 3.650729 | 6.298426 | 0.333093 |
| H | -0.77608 | 3.230485 | 1.550984 |
| H | 5.818558 | 7.265947 | 1.938987 |
| H | 2.950244 | -0.8408  | -0.29812 |
| H | 4.330007 | -1.60889 | -2.1155  |
| H | 6.470569 | -1.62753 | -3.33523 |
| H | 8.833441 | -1.03556 | -3.47124 |
| H | 9.664179 | 5.468574 | 2.293942 |
| H | 8.370616 | 6.607815 | 0.551666 |
| H | 10.57272 | 0.953713 | 3.382506 |
| H | 10.41311 | 3.390528 | 3.37441  |
| H | 3.060064 | 3.447852 | 1.741075 |
| H | 1.842326 | 2.87994  | 0.635867 |
| H | 10.40448 | 1.291819 | -1.29006 |
| H | 8.706775 | -1.16328 | 1.294357 |
| H | 12.41938 | 1.280657 | -1.53715 |



|   |          |          |          |
|---|----------|----------|----------|
| H | 9.420961 | -3.08644 | 1.475886 |
| H | 13.67682 | 0.581644 | -4.29448 |
| H | 15.95499 | -0.13798 | -4.84293 |
| H | 16.43236 | -1.62183 | -0.87904 |
| H | 14.11987 | -0.89613 | -0.33889 |
| H | 10.95966 | -4.20809 | 3.857554 |
| H | 12.52142 | -6.13204 | 3.992343 |
| H | 13.3959  | -5.6788  | -0.15191 |
| H | 11.84947 | -3.78459 | -0.27523 |
| H | 2.287643 | -0.2485  | 2.470531 |
| H | 1.922188 | 0.453225 | 0.912011 |
| H | 5.547219 | 6.73088  | -1.83944 |
| H | 6.224433 | 6.987776 | -0.24747 |
| H | 2.306529 | 2.007956 | 3.501404 |
| H | 0.786454 | 1.677949 | 2.710792 |
| H | 5.138358 | 4.720767 | 0.401815 |
| H | 4.296085 | 4.806792 | -1.11147 |
| H | 3.684876 | 7.298909 | -0.09571 |
| H | 2.673207 | 5.905809 | 0.094755 |
| C | 14.66632 | -7.61679 | 1.028091 |
| H | 15.22981 | -8.43619 | 1.440712 |
| H | 14.02716 | -7.97872 | 0.233116 |
| H | 15.34391 | -6.86879 | 0.637203 |
| C | 18.24817 | -1.26954 | -4.36725 |
| H | 19.22285 | -1.71149 | -4.24932 |
| H | 17.68868 | -1.81633 | -5.11547 |
| H | 18.35333 | -0.23693 | -4.67544 |
| O | 13.89602 | -7.09712 | 2.111103 |
| O | 17.62564 | -1.36478 | -3.088   |
| H | 7.33768  | 2.879201 | -1.19413 |
| H | 6.276202 | 1.255186 | 1.378047 |
| C | -15.3959 | 1.310208 | -2.1788  |
| C | -14.7362 | 0.149472 | -2.05195 |
| C | -13.3126 | 0.262151 | -1.79737 |
| C | -12.8839 | 1.539    | -1.73747 |
| S | -14.266  | 2.69695  | -1.99062 |
| C | -11.5402 | 2.050906 | -1.48954 |
| C | -10.5004 | 2.184079 | -2.34213 |

|   |          |          |          |
|---|----------|----------|----------|
| C | -9.30684 | 2.689332 | -1.70144 |
| C | -9.41602 | 2.920551 | -0.38099 |
| S | -11.0843 | 2.562779 | 0.188443 |
| C | -9.60697 | -4.759   | -0.94573 |
| C | -8.53805 | -5.47345 | -1.40625 |
| C | -7.27038 | -4.87661 | -1.57458 |
| C | -7.09524 | -3.52581 | -1.19517 |
| C | -8.21183 | -2.8031  | -0.71454 |
| C | -9.43787 | -3.39723 | -0.62736 |
| C | -6.17523 | -5.59039 | -2.13001 |
| C | -4.9921  | -4.97269 | -2.35114 |
| C | -4.81131 | -3.60922 | -1.99661 |
| C | -5.81211 | -2.90679 | -1.37559 |
| C | -6.30665 | 0.648496 | -3.81155 |
| C | -6.19489 | -0.46876 | -3.04275 |
| C | -5.55225 | -0.40296 | -1.77502 |
| C | -5.02825 | 0.835131 | -1.34767 |
| C | -5.06074 | 1.943979 | -2.22922 |
| C | -5.68954 | 1.860519 | -3.43332 |
| C | -5.52792 | -1.52208 | -0.87616 |
| C | -5.16397 | -1.31719 | 0.4309   |
| C | -4.62436 | -0.07293 | 0.842231 |
| C | -4.51765 | 0.955756 | -0.0317  |
| C | -12.4335 | -0.95058 | -1.63254 |
| O | -10.4893 | -2.58733 | -0.23862 |
| O | -7.06936 | 0.622616 | -4.97955 |
| N | -3.547   | -3.0019  | -2.25285 |
| N | -5.2656  | -2.35964 | 1.397584 |
| C | -3.02594 | -2.74481 | -3.4777  |
| C | -6.13693 | -2.37963 | 2.43309  |
| N | -1.85307 | -2.10366 | -3.41675 |
| S | -3.85457 | -3.24953 | -4.94817 |
| N | -6.03804 | -3.48133 | 3.180417 |
| S | -7.24949 | -1.04426 | 2.7449   |
| C | -0.96916 | -1.62162 | -4.40809 |
| C | -6.74354 | -3.89039 | 4.336145 |
| C | -1.28008 | -1.39147 | -5.73922 |
| C | -0.32035 | -0.87882 | -6.61064 |

|   |          |          |          |
|---|----------|----------|----------|
| C | 0.947986 | -0.58041 | -6.15528 |
| C | 1.263284 | -0.78694 | -4.81886 |
| C | 0.319281 | -1.30041 | -3.95546 |
| C | -8.10483 | -3.67515 | 4.544389 |
| C | -8.72256 | -4.17112 | 5.678364 |
| C | -7.99999 | -4.90321 | 6.607656 |
| C | -6.65366 | -5.1449  | 6.398408 |
| C | -6.02902 | -4.6382  | 5.26534  |
| C | -11.854  | -3.00169 | -0.27781 |
| C | -8.27035 | 1.420029 | -4.98382 |
| C | -12.6999 | -1.74026 | -0.33965 |
| C | -9.40269 | 0.779365 | -4.17893 |
| C | -10.5208 | 1.790647 | -3.8018  |
| H | -15.2265 | -0.80126 | -2.13531 |
| H | -8.37577 | 2.809375 | -2.21538 |
| H | -10.558  | -5.23705 | -0.82562 |
| H | -8.65798 | -6.51057 | -1.65914 |
| H | -6.30522 | -6.62424 | -2.38946 |
| H | -4.16979 | -5.48972 | -2.7978  |
| H | -4.60318 | 2.863746 | -1.91811 |
| H | -5.72258 | 2.699278 | -4.10132 |
| H | -4.29569 | 0.021801 | 1.856122 |
| H | -4.08022 | 1.885162 | 0.270978 |
| H | -11.3946 | -0.65938 | -1.64126 |
| H | -12.5867 | -1.60817 | -2.48657 |
| H | -2.9961  | -2.71292 | -1.46429 |
| H | -4.61348 | -3.12549 | 1.355481 |
| H | -1.49342 | -1.96216 | -2.47439 |
| H | -5.25079 | -4.08809 | 2.943583 |
| H | -2.25549 | -1.61179 | -6.10661 |
| H | -0.59605 | -0.71968 | -7.63393 |
| H | 2.245797 | -0.53663 | -4.4721  |
| H | 0.570814 | -1.4398  | -2.92047 |
| H | -8.66949 | -3.11639 | 3.831548 |
| H | -9.76682 | -4.00402 | 5.852232 |
| H | -6.07256 | -5.7193  | 7.091104 |
| H | -4.9874  | -4.84557 | 5.09707  |
| H | -12.0835 | -3.58653 | 0.605446 |

|   |          |          |          |
|---|----------|----------|----------|
| H | -12.0381 | -3.61534 | -1.15365 |
| H | -8.53956 | 1.517916 | -6.02499 |
| H | -8.04458 | 2.408762 | -4.60172 |
| H | -12.4719 | -1.12028 | 0.518486 |
| H | -13.7485 | -2.02103 | -0.27217 |
| H | -8.99081 | 0.339958 | -3.28017 |
| H | -9.81822 | -0.03994 | -4.75379 |
| H | -10.424  | 2.688044 | -4.41057 |
| H | -11.4906 | 1.374129 | -4.03559 |
| C | -8.05138 | -6.11085 | 8.726451 |
| H | -8.8068  | -6.33292 | 9.462971 |
| H | -7.64434 | -7.0357  | 8.336011 |
| H | -7.25527 | -5.53793 | 9.186225 |
| C | 1.73286  | 0.197002 | -8.33026 |
| H | 2.662406 | 0.585367 | -8.7138  |
| H | 1.468966 | -0.70571 | -8.86833 |
| H | 0.950061 | 0.93387  | -8.46554 |
| O | -8.70637 | -5.36336 | 7.710211 |
| O | 1.960761 | -0.06906 | -6.95346 |
| H | -6.6262  | -1.38584 | -3.38532 |
| H | -8.11444 | -1.78049 | -0.41618 |
| C | -16.8496 | 1.533623 | -2.44044 |
| H | -17.315  | 2.09516  | -1.63776 |
| H | -17.008  | 2.084151 | -3.36142 |
| H | -17.3616 | 0.582556 | -2.52541 |
| C | 5.964557 | 7.451687 | 4.776068 |
| H | 6.28417  | 6.65769  | 5.441655 |
| H | 6.832223 | 7.799427 | 4.228327 |
| H | 5.602589 | 8.269634 | 5.38921  |
| C | -2.48184 | 5.38753  | 2.113221 |
| C | -3.21257 | 6.474457 | 1.787419 |
| S | -3.54374 | 3.945173 | 2.291481 |
| C | -4.61673 | 6.217173 | 1.620429 |
| H | -2.77372 | 7.436925 | 1.61837  |
| C | -4.97835 | 4.932357 | 1.820631 |
| H | -5.31659 | 6.974067 | 1.329384 |
| C | -1.3852  | -4.29785 | 2.690763 |
| C | -1.29734 | -3.53401 | 1.536913 |

|   |          |          |          |
|---|----------|----------|----------|
| C | -0.08752 | -3.00654 | 1.11054  |
| C | 1.062448 | -3.27551 | 1.844936 |
| C | 0.990095 | -4.04975 | 2.995136 |
| C | -0.23161 | -4.55277 | 3.4224   |
| H | -2.17855 | -3.34228 | 0.968943 |
| H | 1.999271 | -2.88187 | 1.503729 |
| H | 1.881915 | -4.2572  | 3.557929 |
| H | -0.31281 | -5.13834 | 4.316432 |
| C | -0.03979 | -2.16043 | -0.13176 |
| O | 1.047932 | -1.59599 | -0.43121 |
| C | -2.72469 | -4.80583 | 3.15722  |
| O | -2.79001 | -5.38174 | 4.26582  |
| O | -3.71694 | -4.57738 | 2.381706 |
| O | -1.11395 | -2.06808 | -0.80517 |
| C | -6.24767 | 4.26518  | 1.604468 |
| C | -6.76422 | 3.199662 | 2.248254 |
| S | -7.27063 | 4.699127 | 0.176466 |
| C | -7.95399 | 2.659183 | 1.653188 |
| H | -6.30055 | 2.74896  | 3.101761 |
| C | -8.35927 | 3.301383 | 0.541961 |
| H | -8.42059 | 1.766208 | 2.013394 |

Total energy = -9832.058698 Hartree

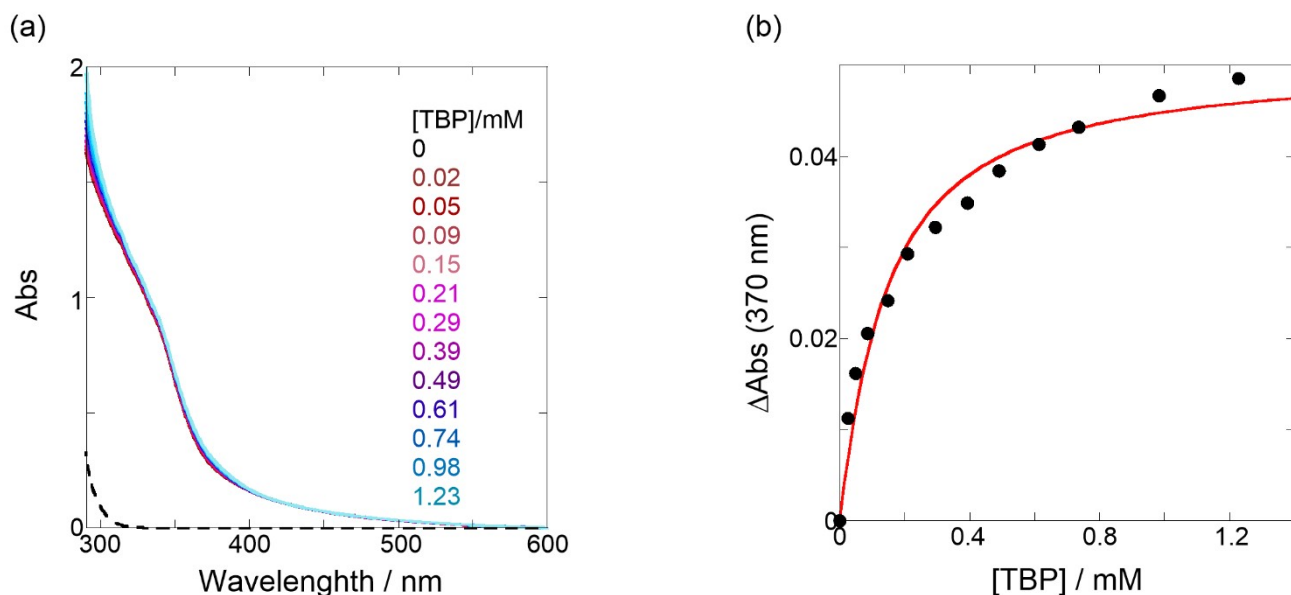

**Figure S10.** (a) UV/vis spectral changes of a chloroform solution of **PT1** (45.8 μM, black) upon gradual addition of TBP (0.02-1.23 mM, colored lines); the dotted line represents the UV spectrum of TBP only. (b) Nonlinear least-squares fitting, assuming 1:1 model, to determine the binding constant.

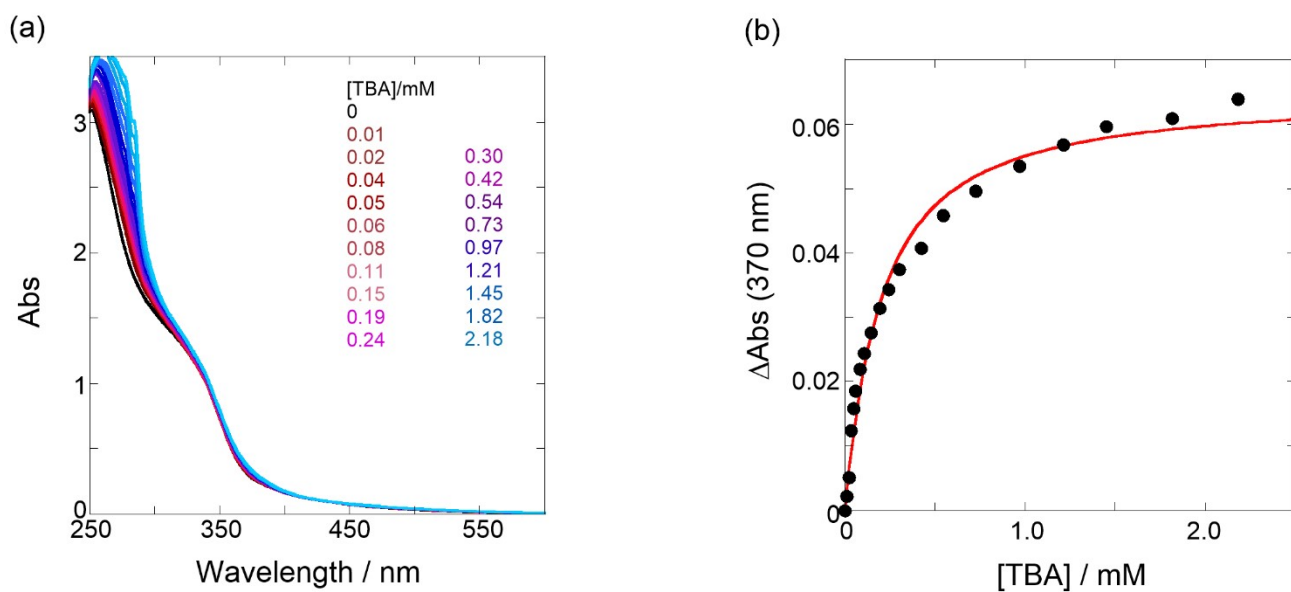

**Figure S11.** (a) UV/vis spectral changes of a chloroform solution of **PT2** (51.5 μM, black) upon gradual addition of TBA (0.01-2.18 mM, colored lines). (b) Nonlinear least-squares fitting, assuming 1:1 model, to determine the binding constant.

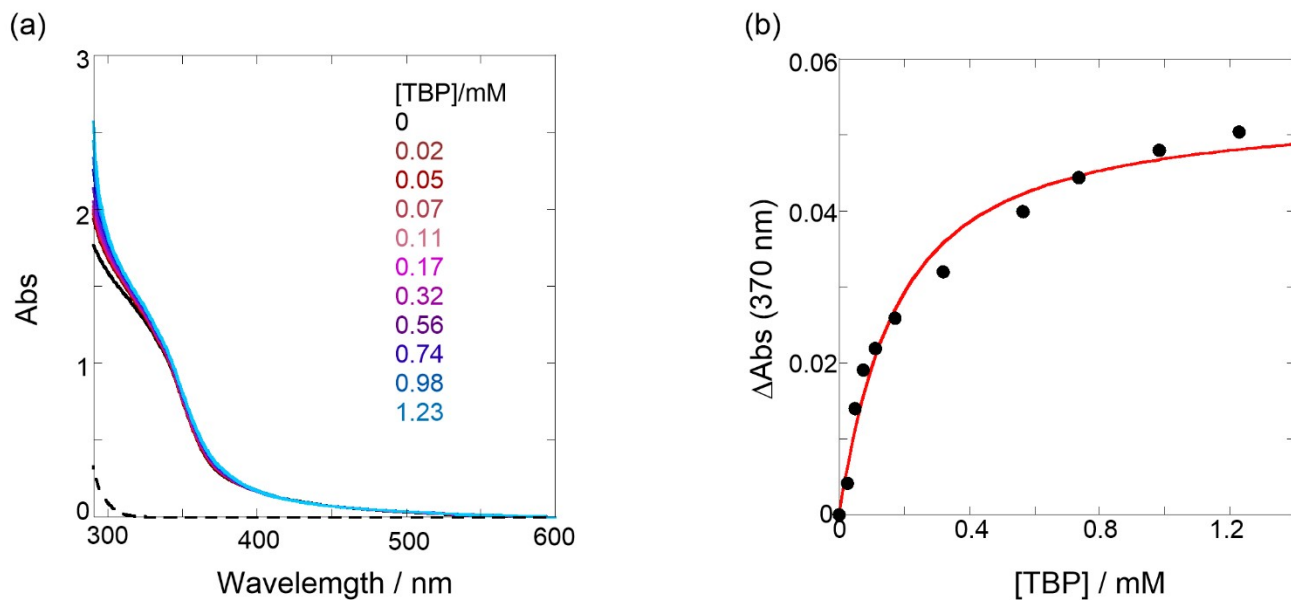

**Figure S12.** (a) UV/vis spectral changes of a chloroform solution of **PT2** (51.5 μM, black) upon gradual addition of TBP (0.02-1.23 mM, colored lines); the dotted line represents the UV spectrum of TBP only. (b) Nonlinear least-squares fitting, assuming 1:1 model, to determine the binding constant.

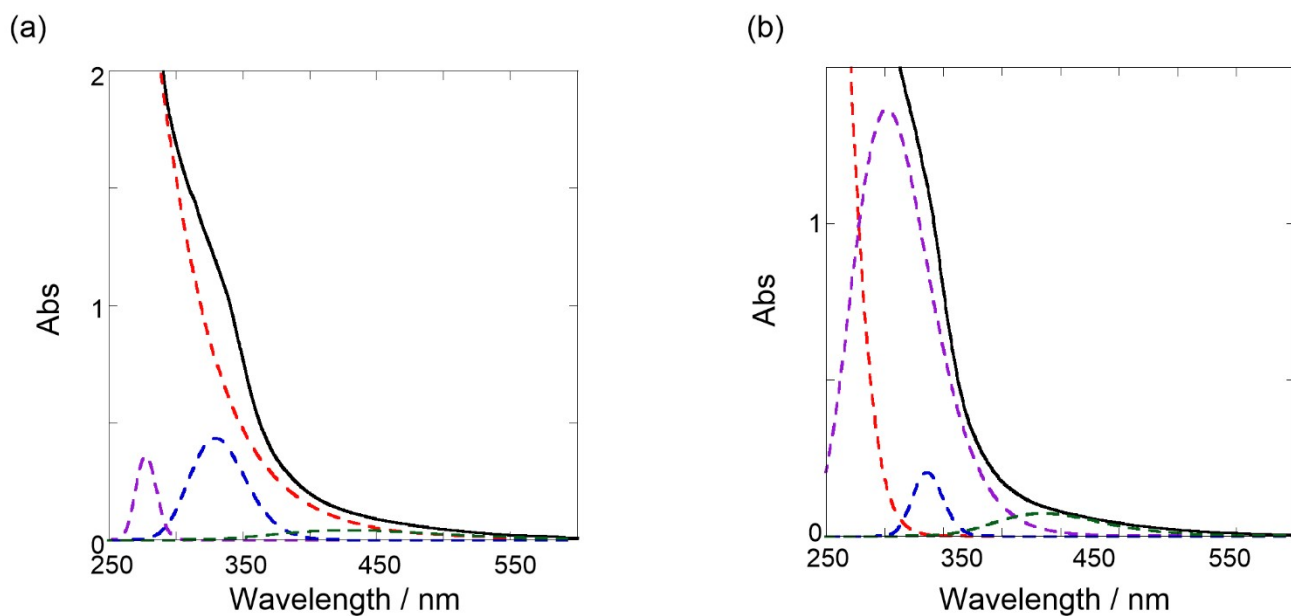

**Figure S13.** UV/vis spectra (black solid lines) of (a) **PT1** (52.4 μM) with TBA (1.25 mM) and (b) **PT2** (51.5 μM) with TBA (2.18 mM) and results of waveform separation (colored dotted lines).
